# Supplementary material for: Chemo-enzymatic syntheses of drimane-type sesquiterpenes and the fundamental core of hongoquercin meroterpenoid by recombinant squalene–hopene cyclase
Source: Royal Society of Chemistry journal article supplement (doi:10.1039/c1ob06419c), 2011-09-20

## Electronic Supporting Information (ESI)

### Chemo-enzymatic syntheses of drimane-type sesquiterpenes and of a cyclic core of the meroterpene by recombinant squalene-hopene cyclase

Yukie Yonemura, Takuro Ohyama, and Tsutomu Hoshino\*

*Department of Applied Biological Chemistry, Faculty of Agriculture, and Graduate School of Science and Technology, Niigata University, Nishi-ku, Ikarashi 2-8050, Niigata 950-2181, Japan*

\*hoshitsu@agr.niigata-u.ac.jp

| Contents                                                                                                                                                                    | Page    |
|-----------------------------------------------------------------------------------------------------------------------------------------------------------------------------|---------|
| 1. Syntheses of substrates <b>9</b> , <b>13</b> and <b>14</b> .                                                                                                             | S3-S5   |
| 2. GC trace of reaction mixture of <b>14</b> with SHC                                                                                                                       | S5      |
| 3. Spectroscopic data of product <b>15</b><br>(1) EIMS spectrum, (2) NMR data analyses and other data,<br>(3) <sup>1</sup> H-NMR spectrum, (4) <sup>13</sup> C-NMR spectrum | S6-S7   |
| 4. Spectroscopic data of product <b>16</b><br>(1) EIMS spectrum, (2) NMR data analyses and other data                                                                       | S8      |
| 5. Spectroscopic data of product <b>17</b><br>(1) EIMS spectrum, (2) NMR data analyses and other data,<br>(3) <sup>1</sup> H-NMR spectrum, (4) <sup>13</sup> C-NMR spectrum | S9-S10  |
| 6. Spectroscopic data of product <b>18</b><br>(1) EIMS spectrum, (2) NMR data analyses and other data,<br>(3) <sup>1</sup> H-NMR spectrum, (4) <sup>13</sup> C-NMR spectrum | S11-S12 |
| 7. Spectroscopic data of product <b>19</b>                                                                                                                                  | S13     |

- (1) EIMS spectrum, (2) NMR data analyses and other data,
8. Spectroscopic data of product **20** S14-S21
- (1) EIMS spectrum, (2) NMR data analyses and other data,
- (3) <sup>1</sup>H-NMR spectrum, (4) <sup>13</sup>C-NMR spectrum
- (5) <sup>1</sup>H-<sup>1</sup>H COSY spectrum, (6) HOHAHA spectrum (7) NOESY spectrum,
- (8) HMQC spectrum, (9) HMBC spectrum
9. Spectroscopic data of product **21** S22-S23
- (1) EIMS spectrum, (2) NMR data analyses and other data,
- (3) <sup>1</sup>H-NMR spectrum, (4) <sup>13</sup>C-NMR spectrum
10. Spectroscopic data of product **22** S24-S25
- (1) EIMS spectrum, (2) NMR data analyses and other data,
- (3) <sup>1</sup>H-NMR spectrum, (4) <sup>13</sup>C-NMR spectrum
11. Spectroscopic data of product **23** S26-S27
- (1) EIMS spectrum, (2) NMR data analyses and other data,
- (3) <sup>1</sup>H-NMR spectrum, (4) <sup>13</sup>C-NMR spectrum
12. Spectroscopic data of product **24**-acetate (**25**) S28-S29
- (1) EIMS spectrum, (2) NMR data analyses and other data,
- (3) <sup>1</sup>H-NMR spectrum, (4) <sup>13</sup>C-NMR spectrum
13. Polycyclization reactions of **28**, **31** and **32** by SHC enzyme S30

## 1. Syntheses of substrates 9, 13 and 14.

### Preparation of substrate 9

Farnesol **4** was subjected to the mesylation reaction with MsCl/ Et<sub>3</sub>N in dry CH<sub>2</sub>Cl<sub>2</sub>, followed by LiAlH<sub>4</sub> reduction in dry Et<sub>2</sub>O, yielding the desired **9**. The synthetic method was essentially the same as our previous report (T. Hoshino, S. Nakano, T. Kondo, T. Sato and A. Miyoshi, *Org. Biomol. Chem.*, 2004, **2**, 1456-1470. <sup>1</sup>H NMR (400 MHz, CDCl<sub>3</sub>) δ 5.22 (q, *J*=7.0 Hz), 5.11 (2H, m), 2.15-2.04 (4H, m), 2.10-1.95 (4H, m), 1.68 (3H, s), 1.61 (9H, s), 1.57 (3H, d, *J*=7.0 Hz); <sup>13</sup>C NMR (100.6 MHz, CDCl<sub>6</sub>) δ 135.7 (s), 134.9 (s), 131.2 (s), 124.4 (d), 124.3 (d), 118.2 (d), 39.71 (2xC, t), 26.73 (t), 26.61 (t), 25.68 (q), 17.66 (q), 15.95 (q), 15.64 (q), 13.33 (q). EIMS *m/z* (%): 69 (100), 81 (34), 95 (23), 136 (12), 137 (13), 163 (5), 191 (12), 206 (M<sup>+</sup>, 2).

### Preparation of substrates 13 and 14

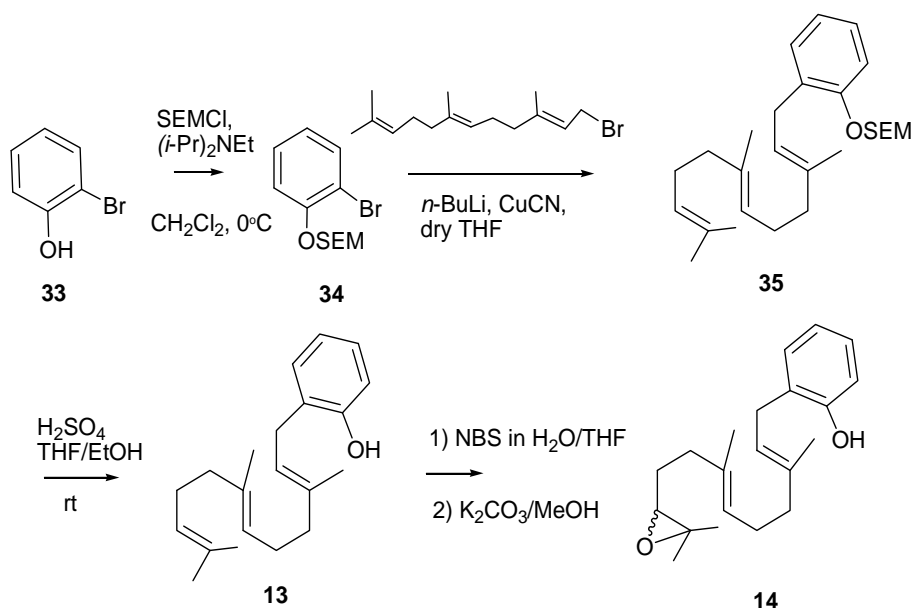

All the reactions were conducted under nitrogen atmosphere.

*Synthesis of 34.* 2-Bromophenol **33** (300 mg, 1.7 mmol) and (i-Pr)<sub>2</sub>NEt (0.945 ml, 3.2 equiv.) were dissolved in 6 ml of CH<sub>2</sub>Cl<sub>2</sub> and cooled on ice. To the solution, SEMCl (0.660 ml, 2.2 equiv.) was added in a drop-wise and stirred for 2 h. The reaction mixture was poured into ice-water and extracted with hexane (10 ml x 3), which was washed with sat. brine and dried over Na<sub>2</sub>SO<sub>4</sub>. The product was purified with a SiO<sub>2</sub> column chromatography (hexane: EtOAc=100:20) to yield 545 mg

(100 % yeold).  $^1\text{H}$  NMR (400 MHz,  $\text{CDCl}_3$ )  $\delta$  7.53 (dd,  $J=7.8$ , 1.6 Hz), 7.18 (dd,  $J=7.8$ , 1.6 Hz), 7.03 (ddd, (dd,  $J=7.8$ , 7.8, 1.6 Hz), 6.62 (ddd, (dd,  $J=7.8$ , 7.8, 1.6 Hz), 5.06 (2H, s), 3.76 (2H, t,  $J=8.0$  Hz), 0.946 (2H, t,  $J=8.0$  Hz), 0.017 (9H, s).

*Synthesis of 35.* A solution of **34** (475 mg, 1.5 mmol) dissolved in dry THF (7 ml) was cooled to  $-78^\circ\text{C}$ . To the solution, *n*-BuLi (1.60M in *n*-hexane, 1.05 ml, 1 equiv.) was added in a small portion and then stirred for 30 min to afford a pale yellow suspension. CuCN (270 mg, 2 equiv.) was added to the suspension, which was warmed up to  $-10^\circ\text{C}$ , yielding a red brown colored solution (whole portion of CuCN added was dissolved). The solution was cooled again to  $-78^\circ\text{C}$  and the THF solution of farnesyl bromide 426 mg, 1.5 mmol), prepared with  $\text{PBr}_3$ , was added in a drop-wise manner into the reaction flask and stirred for 3 h. The reaction mixture was poured into ice-water and the products were extracted with hexane (100 ml x 3) and dried over  $\text{Na}_2\text{SO}_4$ . Two major products (557 mg as mixture) including **35** were visible on  $\text{SiO}_2$  TLC were used in a next reaction without purification.

*Synthesis of 13.* The mixture (145 mg), prepared by the above reaction, was dissolved in 2 ml of a mixture of EtOH and THF (1:1). To the solution, was added 0.3 ml of a mixed solution (EtOH/ $\text{H}_2\text{SO}_4=30:1$  v/v) and allowed to stand overnight.  $\text{NaHCO}_3$  (5%) was added and the pH was adjusted to 7~8. The products were extracted with hexane (10 ml x 3) and washed with sat. brine, and then purified with  $\text{SiO}_2$  column chromatography (100:0~0.2) to afford the desired **13** (37 mg, 35%).  $^1\text{H}$  NMR (400 MHz,  $\text{C}_6\text{D}_6$ )  $\delta$  7.21 (d,  $J=7.8$  Hz), 7.11 (t,  $J=7.8$  Hz), 6.95 ( $J=7.8$  Hz), 6.67 (d,  $J=7.8$  Hz), 5.49 (1H, t,  $J=7.2$  Hz), 5.34 (2H, m), 4.681 (1H, s, OH), 3.44 (d,  $J=7.2$  Hz), 2.29-2.08 (8H, m), 1.79 (3H, s), 1.70 (3H, s), 1.69 (3H, s), 1.67 (3H, s);  $^{13}\text{C}$  NMR (100.6 MHz,  $\text{C}_6\text{D}_6$ )  $\delta$  154.8 (s), 137.5 (s), 135.3 (s), 131.1 (s), 130.2 (d), 127.6 (d), 127.4 (s), 124.9 (d), 124.4 (d), 122.6 (d), 120.9 (d), 115.7 (d), 40.13 (t), 39.95 (t), 29.52 (t), 27.15 (t), 26.75 (t), 25.83 (q), 17.74 (q), 16.09 (q), 16.04 (q).

*Synthesis of 14.* The synthetic method was essentially the same as our previous report (T. Hoshino, S. Nakano, T. Kondo, T. Sato and A. Miyoshi, *Org. Biomol. Chem.*, 2004, **2**, 1456-1470.  $^1\text{H}$  NMR (400 MHz,  $\text{C}_6\text{D}_6$ )  $\delta$  7.26 (dd,  $J=7.6$ , 1.6 Hz), 7.15 (ddd,  $J=7.6$ , 7.6, 1.6 Hz), 6.96 ((ddd,  $J=7.6$ , 7.6, 1.6 Hz), 6.94 (dd,  $J=7.6$ , 1.6 Hz), 5.59 (t,  $J=7.2$  Hz), 5.29 (t,  $J=7.2$  Hz), 3.57 (d,  $J=7.2$  Hz), 2.72 (t,  $J=6.2$  Hz), 2.22-2.07 (6H, m), 1.75 (3H, s), 1.67 (2H, m), 1.59 (3H, s), 1.24 (3H, s), 1.19 (3H, s);  $^{13}\text{C}$

NMR ( $C_6D_6$ , 100.6 MHz)  $\delta$  15.96 (q), 16.01 (q), 18.76 (q), 26.32 (t), 29.25 (t), 29.84 (t), 36.67 (t), 39.76 (t), 58.32 (s), 63.99 (d), 115.7 (d), 120.6 (d), 123.5 (d), 124.6 (d), 127.5 (d), 130.3 (d), 134.2 (s), 136.2 (s), 155.1 (s).

**2. GC trace of the reaction mixture of 14 with SHC (an excess of Triton X-100 was removed).**

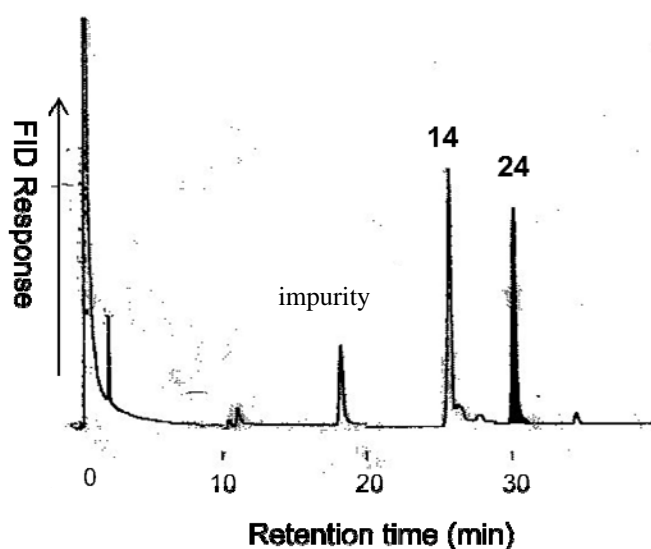

Triton X-100 was removed by a short  $SiO_2$  column. GC conditions: column temp., 190°C; injection temp., 280°C; carrier gas ( $N_2$ ), 0.5 kg/cm<sup>2</sup>. Only one product **24** was produced.

### 3. Spectroscopic data of product 15

#### (1) EIMS spectrum of product 15

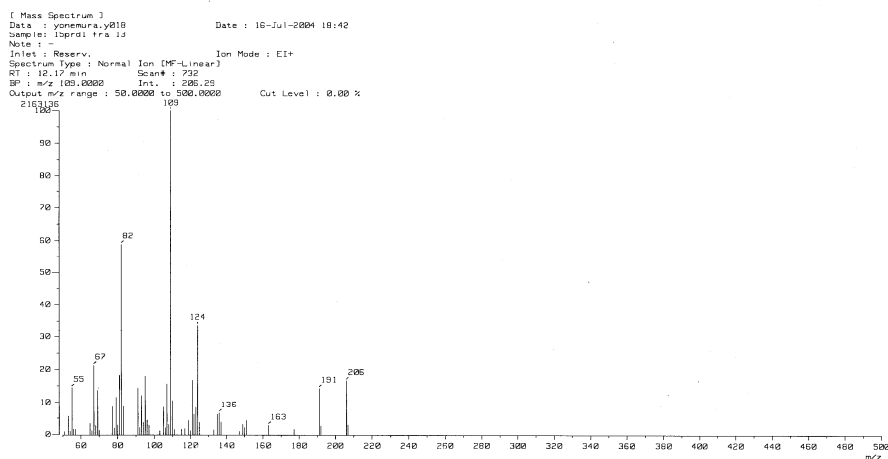

#### (2) NMR data analyses and other data for 15

##### Product 15 (drim-7(8)-ene)

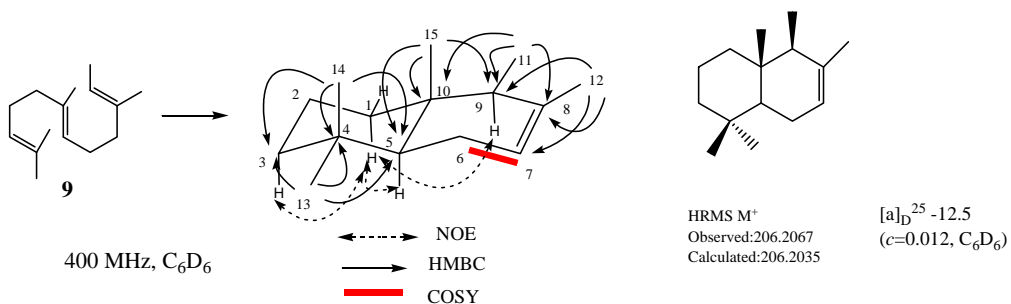

| No | <sup>1</sup> H                          | <sup>13</sup> C | No | <sup>1</sup> H   | <sup>13</sup> C    |
|----|-----------------------------------------|-----------------|----|------------------|--------------------|
| 1  | 0.98(m); 1.86(m)                        | 39.81           | 9  | 1.94 (m)         | 49.03              |
| 2  | 1.63 (m); 1.50 (m)                      | 19.29           | 10 | —                | 36.02              |
| 3  | 1.25 (ddd, 13.0, 12.8, 3.6Hz); 1.54 (m) | 42.55           | 11 | 0.958(d, 7.2 Hz) | 11.58              |
| 4  | —                                       | 33.03           | 12 | 1.75 (3H, br s)  | 21.98 <sup>a</sup> |
| 5  | 1.29 (dd, J=11.8, 5.2 Hz)               | 50.35           | 13 | 0.977(3H, s)     | 33.47              |
| 6  | 1.95 (m); 2.05(m)                       | 24.10           | 14 | 1.008 (3H, s)    | 22.12 <sup>a</sup> |
| 7  | 5.58 (brs)                              | 121.93          | 15 | 0.917 (3H, s)    | 13.47              |
| 8  | —                                       | 135.25          |    |                  |                    |

<sup>a</sup> The carbon signals of C-12 and C-14 are exchangeable due to the close values.

(3)  $^1\text{H-NMR}$  spectrum of product **15** in  $\text{C}_6\text{D}_6$ .

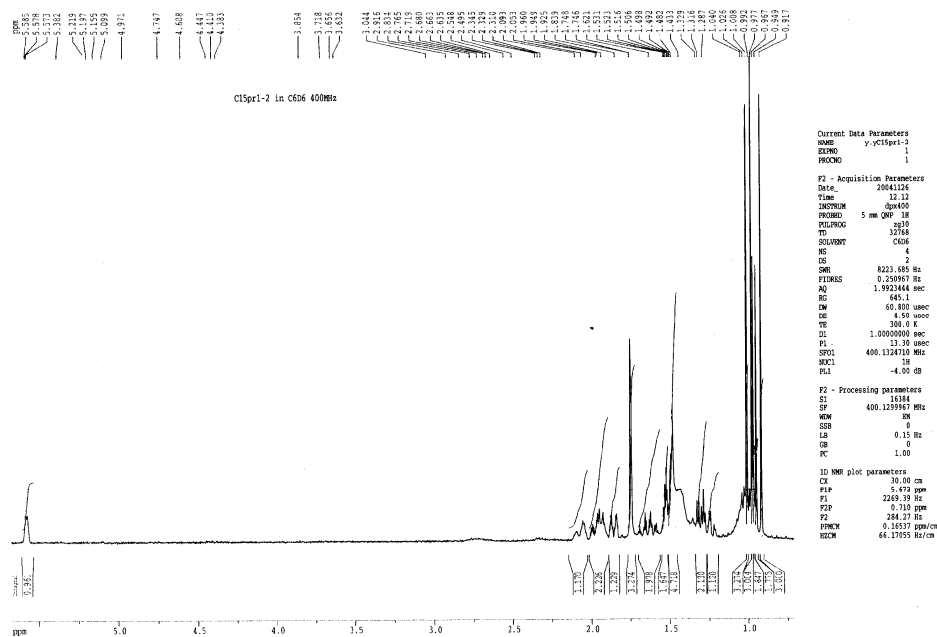

(4)  $^{13}\text{C-NMR}$  spectrum of product **15** in  $\text{C}_6\text{D}_6$ .

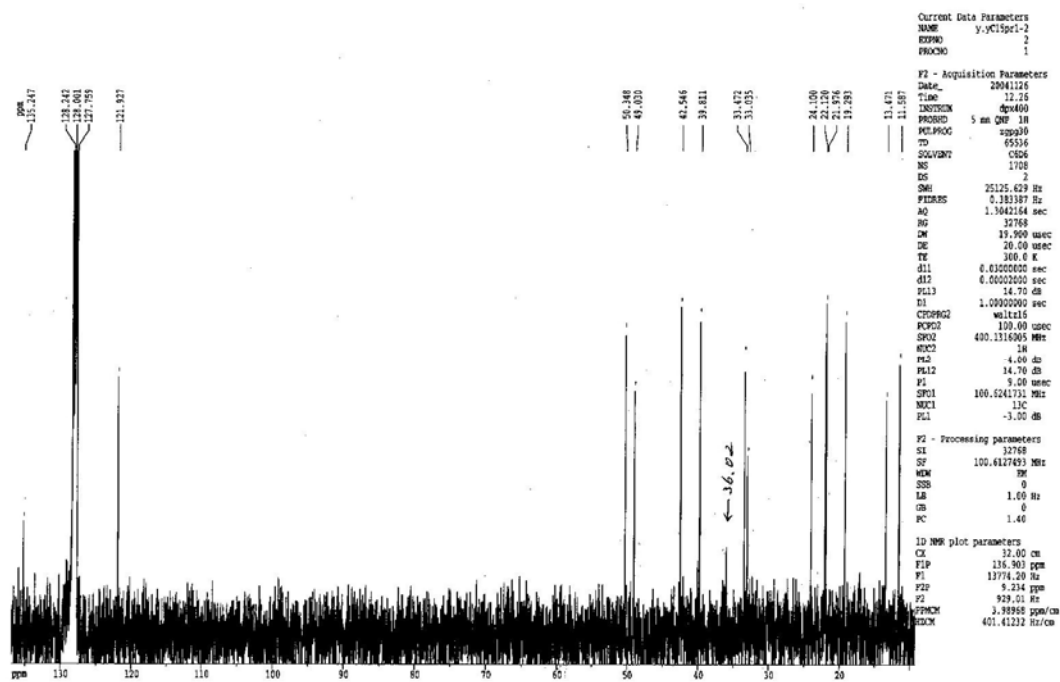

## 4. Spectroscopic data of product 16

### (1) EIMS spectrum of product 16

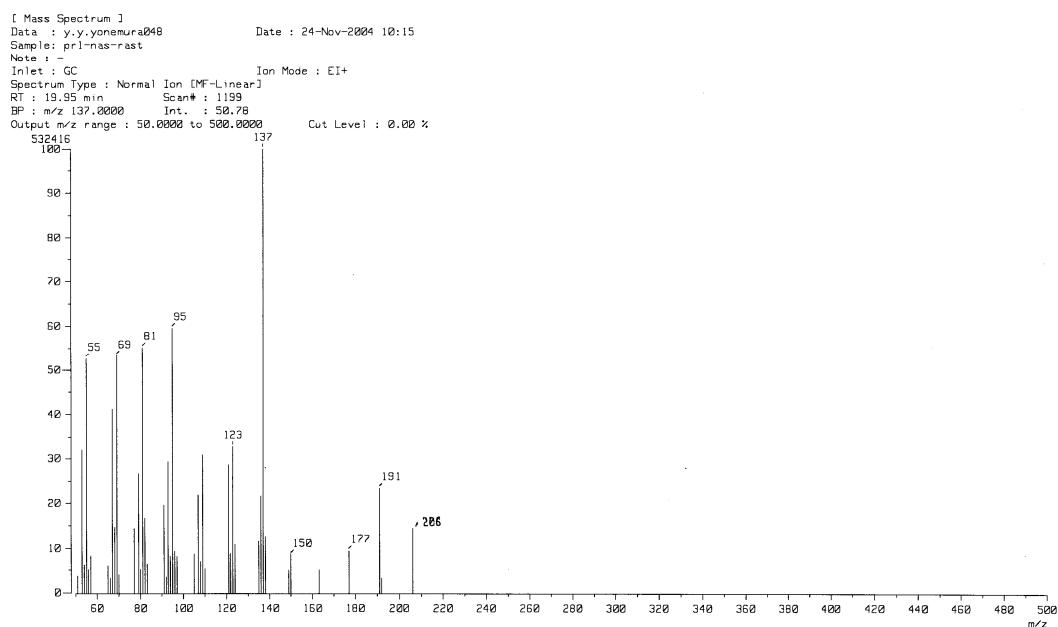

### (2) NMR data analyses and other data for 16

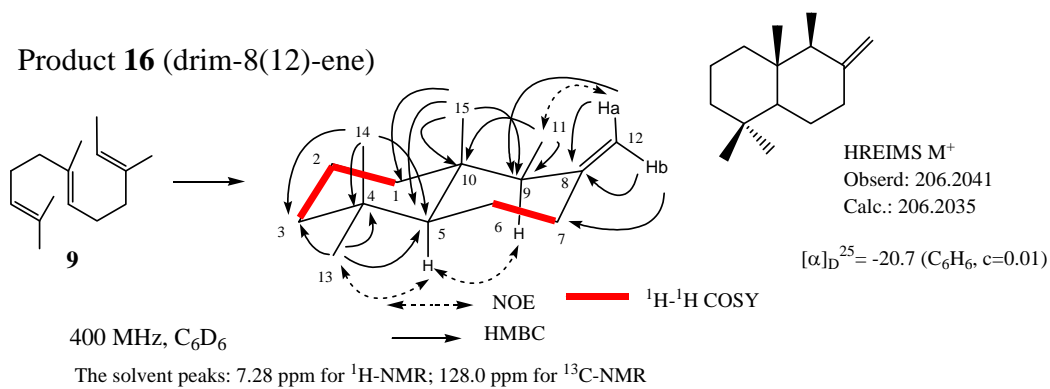

| No | <sup>1</sup> H                                                   | <sup>13</sup> C | No | <sup>1</sup> H             | <sup>13</sup> C |
|----|------------------------------------------------------------------|-----------------|----|----------------------------|-----------------|
| 1  | 0.98(m); 1.65 (m)                                                | 39.54           | 9  | 1.85 (bq, J=6.8 Hz)        | 50.49           |
| 2  | 1.46 (m); 1.54 (m)                                               | 19.64           | 10 | —                          | 39.02           |
| 3  | 1.22(m); 1.47(m)                                                 | 42.44           | 11 | 1.04 (3H, d, J=6.8 Hz)     | 10.64           |
| 4  | —                                                                | 33.51           | 12 | 4.79 (s, Ha); 4.98 (s, Hb) | 151.5 (t)       |
| 5  | 1.11 (m)                                                         | 55.41           | 13 | 0.964 (3H, s)              | 33.71           |
| 6  | 1.43 (m); 1.72 (m)                                               | 24.17           | 14 | 0.927 (3H, s)              | 21.97           |
| 7  | 2.51(ddd, J=12.8, 4.4, 2.0 Hz); 2.15 (ddd, J=12.8, 12.8, 4.4 Hz) | 37.72           | 15 | 0.833 (3H, s)              | 13.48           |
| 8  | —                                                                | 151.5           |    |                            |                 |



## 5. Spectroscopic data of product 17

### (1) EIMS spectrum of product 17

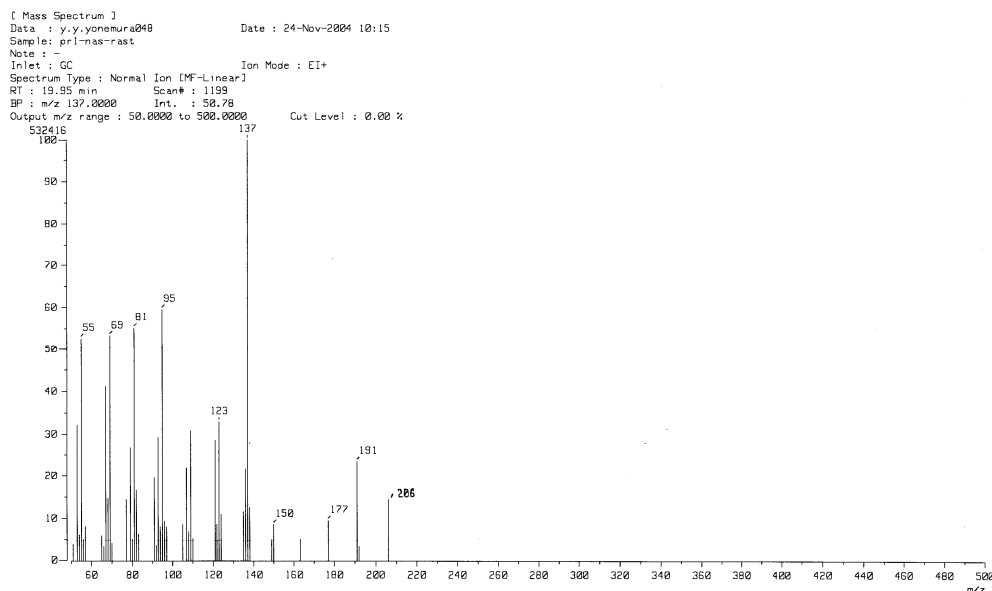

### (2) NMR data analyses and other data for 17

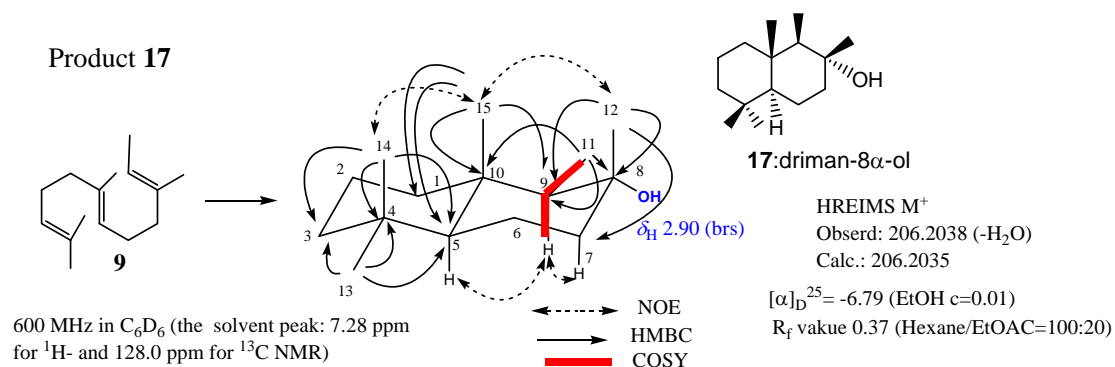

| No | <sup>1</sup> H                                          | <sup>13</sup> C | No | <sup>1</sup> H           | <sup>13</sup> C |
|----|---------------------------------------------------------|-----------------|----|--------------------------|-----------------|
| 1  | 0.85 (m); 1.63 (m)                                      | 39.99           | 9  | 1.22 (m)                 | 55.74           |
| 2  | 1.45 (m); 1.60 (m)                                      | 18.97           | 10 | —                        | 37.86           |
| 3  | 1.19 (m); 1.45 (m)                                      | 42.17           | 11 | 1.015 (3H, d, J=7.0 Hz)  | 7.46            |
| 4  | —                                                       | 33.26           | 12 | 1.13(3H, s)              | 23.21           |
| 5  | 0.87 (m)                                                | 56.14           | 13 | 0.959 (3H, s)            | 33.56           |
| 6  | 1.18 (m); 1.57 (m)                                      | 20.73           | 14 | 0.887 (3H, s)            | 21.73           |
| 7  | 1.39(ddd, 3.9, 12.7, 12.7);<br>1.89(ddd, 3.2,3.2, 12.7) | 44.88           | 15 | 0.800 (3H, s)            | 14.45           |
| 8  | —                                                       | 72.25           | OH | 2.90 (br s) <sup>a</sup> |                 |

<sup>a</sup> This OH signal was observed in acetone d<sub>6</sub>, the chemical shift is expressed in relative to the solvent peak (2.04 ppm for <sup>1</sup>H NMR)



## 6. Spectroscopic data of product 18

### (1) EIMS spectrum of product 18

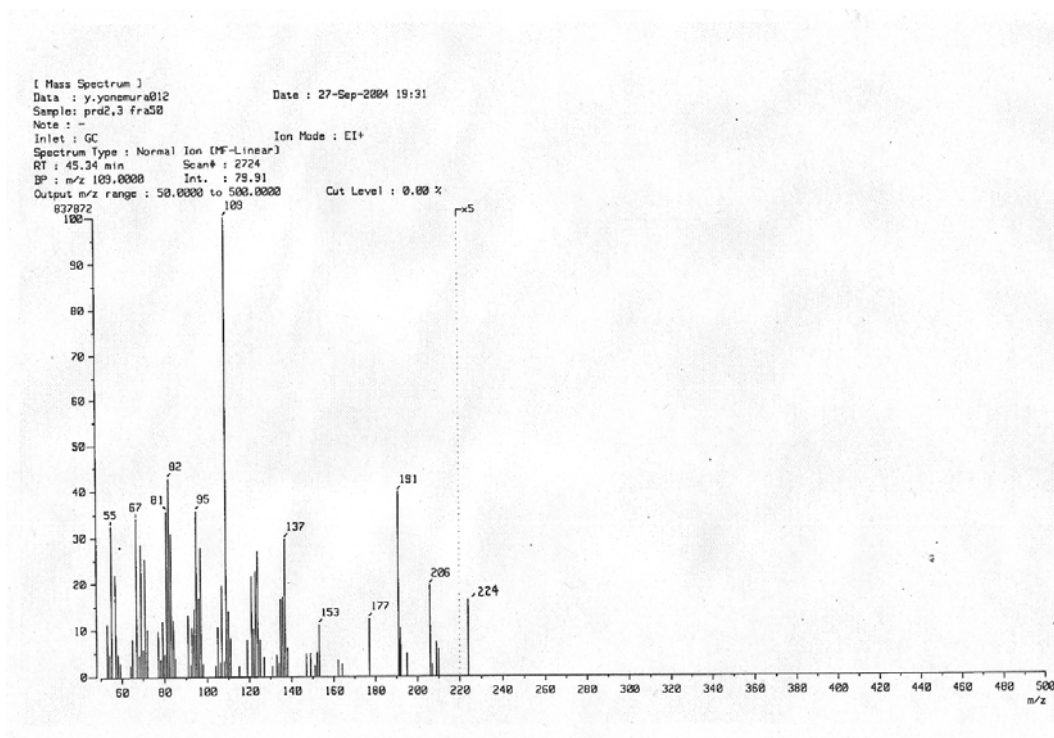

### (2) NMR data analyses and other data for 18

#### Product 18

$[\alpha]_D^{25} = -32.1 (C_6H_6)$   
 $c = 0.037$   
 HRMS  $M^+$   
 Observed: 206.2022 (-H<sub>2</sub>O)  
 Calculated: 206.2035  
 $R_f$  value 0.54 (hexane/EtOAc=100:20)

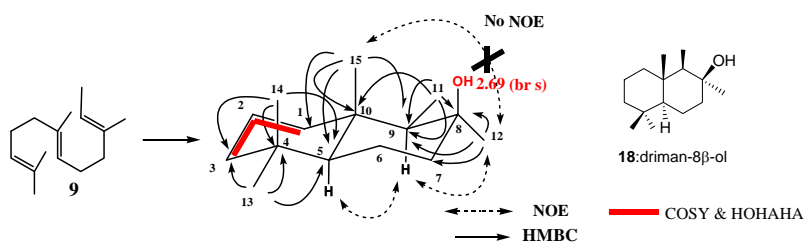

Chemical shifts in acetone  $d_6$ , the solvent peak:  $^1H, 2.04ppm$ ,  $^{13}C, 29.80ppm$

| No | $^1H$                                      | $^{13}C$           | No | $^1H$                     | $^{13}C$ |
|----|--------------------------------------------|--------------------|----|---------------------------|----------|
| 1  | 0.82 (m); 1.68 (m)                         | 40.82              | 9  | 1.01 (1H, q, $J=7.2$ Hz)  | 53.58    |
| 2  | 1.35 (m); 1.59 (m)                         | 19.31 <sup>a</sup> | 10 | —                         | 38.65    |
| 3  | 1.14 (ddd, $J=13.6, 13.6, 4.4$ ); 1.36 (m) | 42.77              | 11 | 0.888 (3H, d, $J=6.8$ Hz) | 7.88     |
| 4  | —                                          | 33.88              | 12 | 1.08 (3H, s)              | 31.41    |
| 5  | 0.87 (m)                                   | 56.89 <sup>a</sup> | 13 | 0.862 (3H, s)             | 34.00    |
| 6  | 1.42 (m); 1.59 (m)                         | 19.25 <sup>a</sup> | 14 | 0.846 (3H, s)             | 22.19    |
| 7  | 1.43 (m); 1.76 (m)                         | 43.62              | 15 | 0.974 (3H, s)             | 14.88    |
| 8  | —                                          | 71.84              | OH | 2.69 (br s) <sup>b</sup>  |          |

<sup>a</sup> The two carbon signals are exchangeable due to the close values.

<sup>b</sup> This OH signal was observed in acetone  $d_6$ , the chemical shift is expressed in relative to the solvent peak (2.04 ppm for  $^1H$  NMR)

(3) <sup>1</sup>H-NMR spectrum of product **18** in acetone-*d*<sub>6</sub>

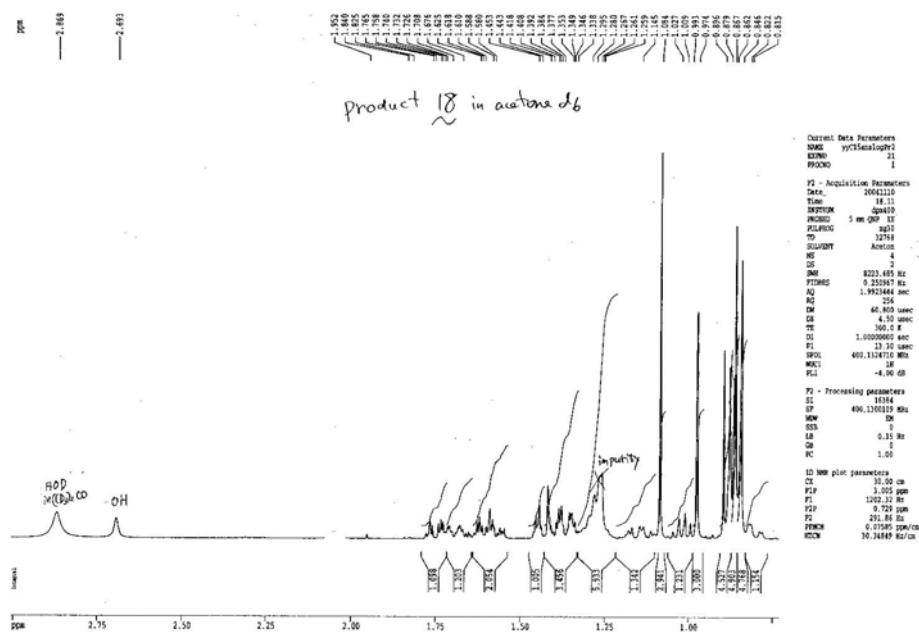

<sup>13</sup>C-NMR spectrum of product **18** in acetone-*d*<sub>6</sub>

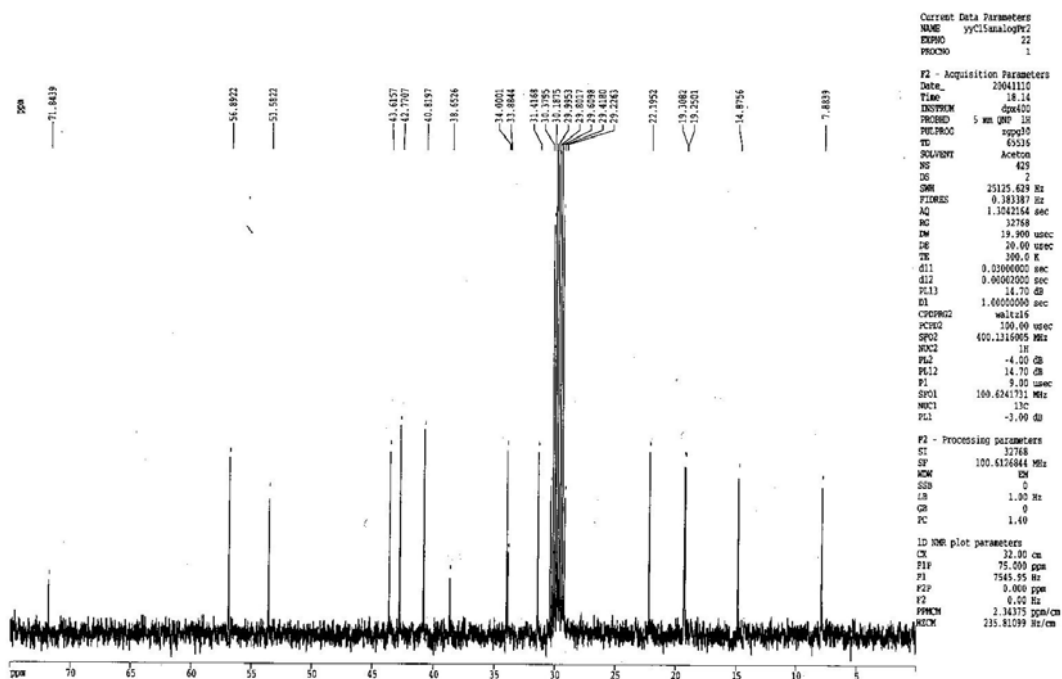

## 7. Spectroscopic data of product 19

### (1) EIMS spectrum of product 19

### (2) NMR data analyses and other data for 19

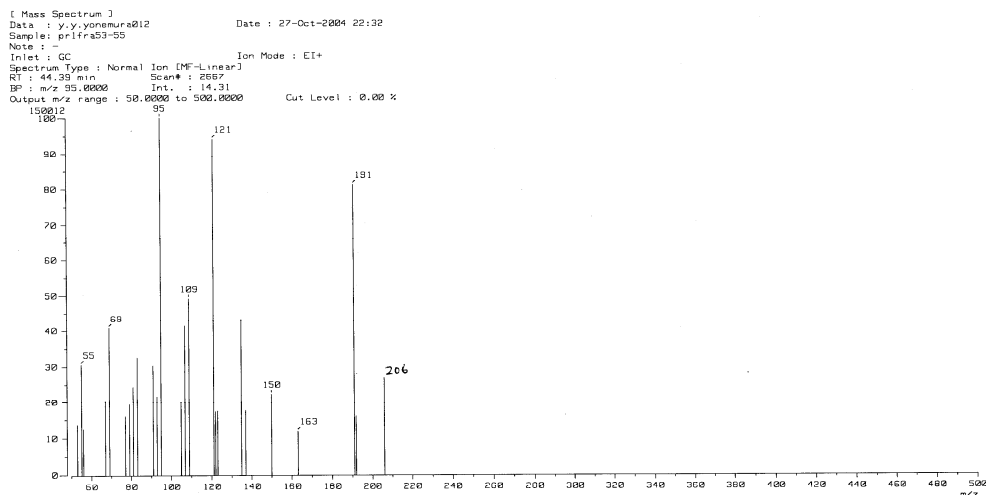

S

### Product 19 (drim-8(9)-ene)

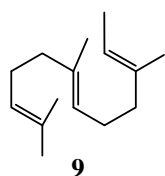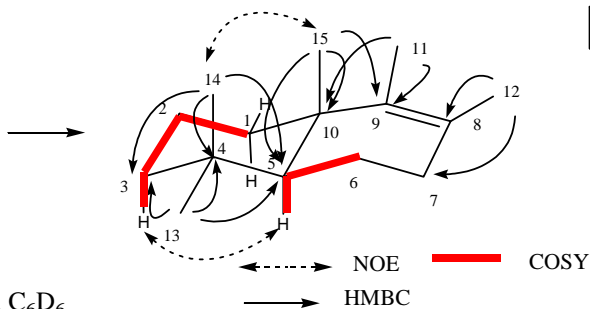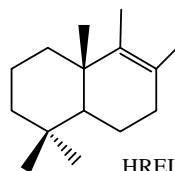

HREIMS M<sup>+</sup>  
 Observed: 206.2038  
 Calculated: 206.2035

$[\alpha]_D^{25} = +22.7$  (C<sub>6</sub>H<sub>6</sub>, c=0.01)  
 lit. value +62 (the solvent and concentration, not described); RM  
 Carmans and W. Craig, Aust. J.  
 Chem., 1971, **24**, 361-370.)

400 MHz, C<sub>6</sub>D<sub>6</sub>

The solvent peaks: 7.28 ppm for <sup>1</sup>H-NMR; 128.0 ppm for <sup>13</sup>C-NMR

| No       | <sup>1</sup> H                         | <sup>13</sup> C       | No        | <sup>1</sup> H | <sup>13</sup> C |
|----------|----------------------------------------|-----------------------|-----------|----------------|-----------------|
| <b>1</b> | 1.85 (m); 1.17(ddd, 12.8, 12.8, 3.6Hz) | <b>37.26</b>          | <b>9</b>  | —              | <b>136.2</b>    |
| <b>2</b> | 1.73(m);1.52(m) <i>b</i>               | <b>19.50</b> <i>a</i> | <b>10</b> | —              | <b>38.50</b>    |
| <b>3</b> | 1.51 (m); 1.24 (m)                     | <b>42.03</b>          | <b>11</b> | 1.67 (3H, s)   | <b>19.83</b>    |
| <b>4</b> | —                                      | <b>33.41</b>          | <b>12</b> | 1.67 (3H, s)   | <b>19.83</b>    |
| <b>5</b> | 1.28 (m)                               | <b>51.85</b>          | <b>13</b> | 1.02 (3H, s)   | <b>33.43</b>    |
| <b>6</b> | 1.73(m);1.52(m) <i>b</i>               | <b>19.48</b> <i>a</i> | <b>14</b> | 0.985 (3H, s)  | <b>21.79</b>    |
| <b>7</b> | 2.10 (m); 1.53 (m)                     | <b>34.05</b>          | <b>15</b> | 1.12 (3H, s)   | <b>19.50</b>    |
| <b>8</b> | —                                      | <b>124.3</b>          |           |                |                 |

The signals of *a* and *b* are indistinguishable due to the very close values.

S13

## 8. Spectroscopic data of product 20

### (1) EIMS spectrum of product 20

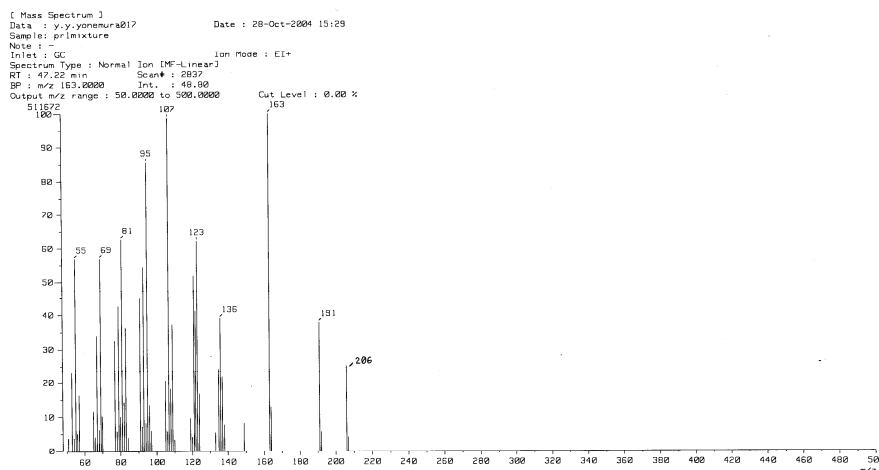

### (2) NMR data analyses and other data for 20

#### Product 20 (oil)

HRMS M<sup>+</sup>  
 Observed:206.2040  
 Calculated:206.2035

[ $\alpha$ ]<sub>D</sub><sup>25</sup> = -10.7 (C<sub>6</sub>H<sub>6</sub>)  
 c=0.014 (g/dl)

-----> NOESY  
 -----> HMBC  
 -----> COSY

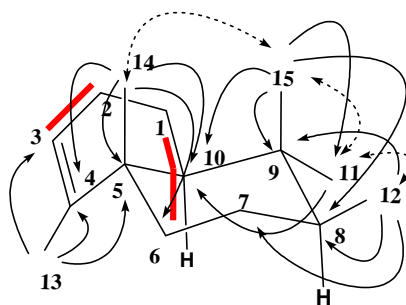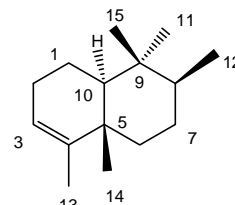

**20**:unnatural (20%)  
 (rearranged drimane skeleton)  
 like a clerodane diterpene skeleton,  
 which was named quasiclerodane

Chemical shifts in C<sub>6</sub>D<sub>6</sub> (400 MHz), relative to the solvent peak of C<sub>6</sub>D<sub>6</sub>:<sup>1</sup>H 7.28ppm, <sup>13</sup>C 128.0ppm

| No | <sup>1</sup> H     | <sup>13</sup> C | No | <sup>1</sup> H         | <sup>13</sup> C |
|----|--------------------|-----------------|----|------------------------|-----------------|
| 1  | 1.56 (m); 1.75 (m) | 19.28           | 9  | —                      | 36.55           |
| 2  | 2.14 (2H, m)       | 27.59           | 10 | 1.27 (dd, 12.0, 1.8Hz) | 52.91           |
| 3  | 5.36 (br s)        | 120.99          | 11 | 1.011 (3H, s)          | 29.30           |
| 4  | —                  | 143.85          | 12 | 0.963 (3H, d, J=6.8Hz) | 16.64           |
| 5  | —                  | 38.48           | 13 | 1.72 (d, J=1.2Hz)      | 18.27           |
| 6  | 1.27 (m); 1.72(m)  | 30.03           | 14 | 1.107 (3H, s)          | 19.62           |
| 7  | 1.28 (m); 1.42(m)  | 28.04           | 15 | 0.809 (3H, s)          | 16.72           |
| 8  | 1.24(m)            | 42.69           |    |                        |                 |

The carbon signals of C12 and C15 may be interchangeable due to the close

(3)  $^1\text{H-NMR}$  spectrum of **20** in  $\text{C}_6\text{D}_6$

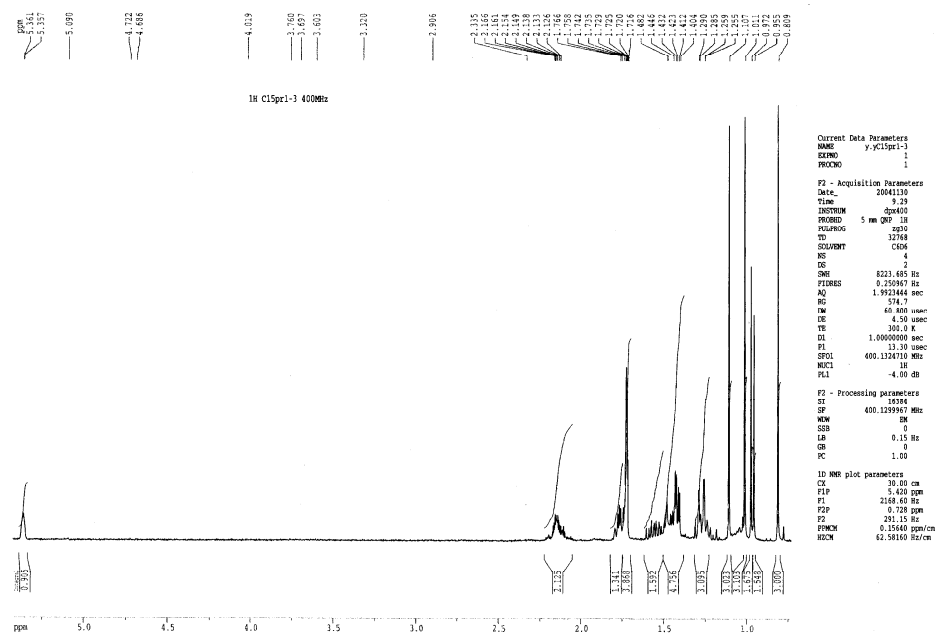

(4)  $^{13}\text{C-NMR}$  spectrum of **20** in  $\text{C}_6\text{D}_6$

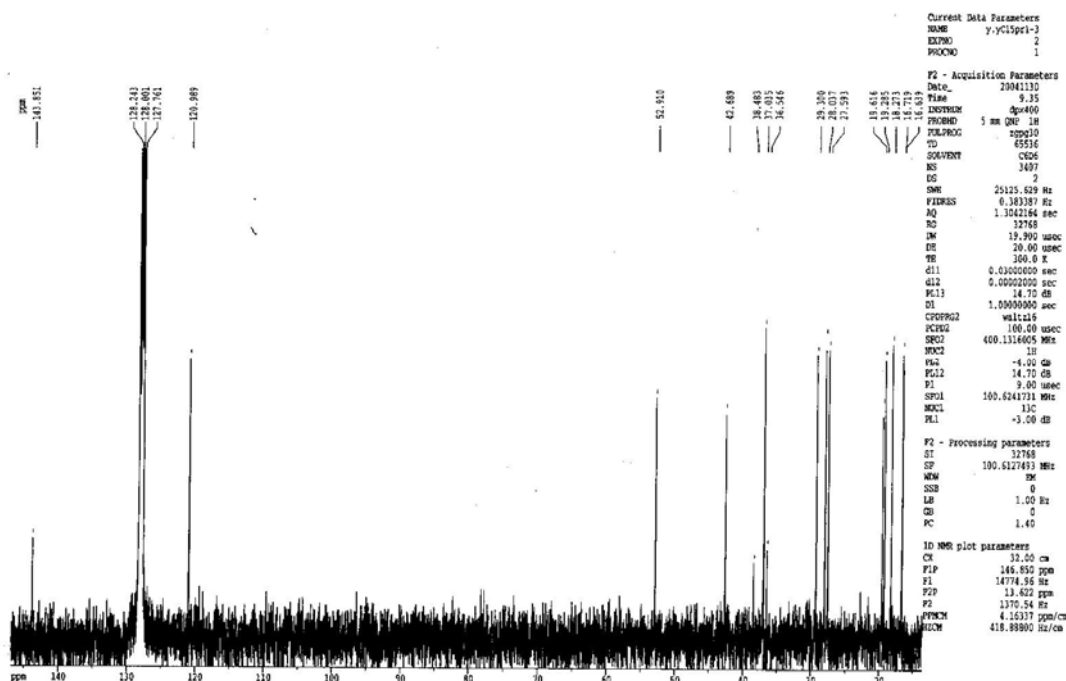







(7) NOESY spectrum of **20** in C<sub>6</sub>D<sub>6</sub>

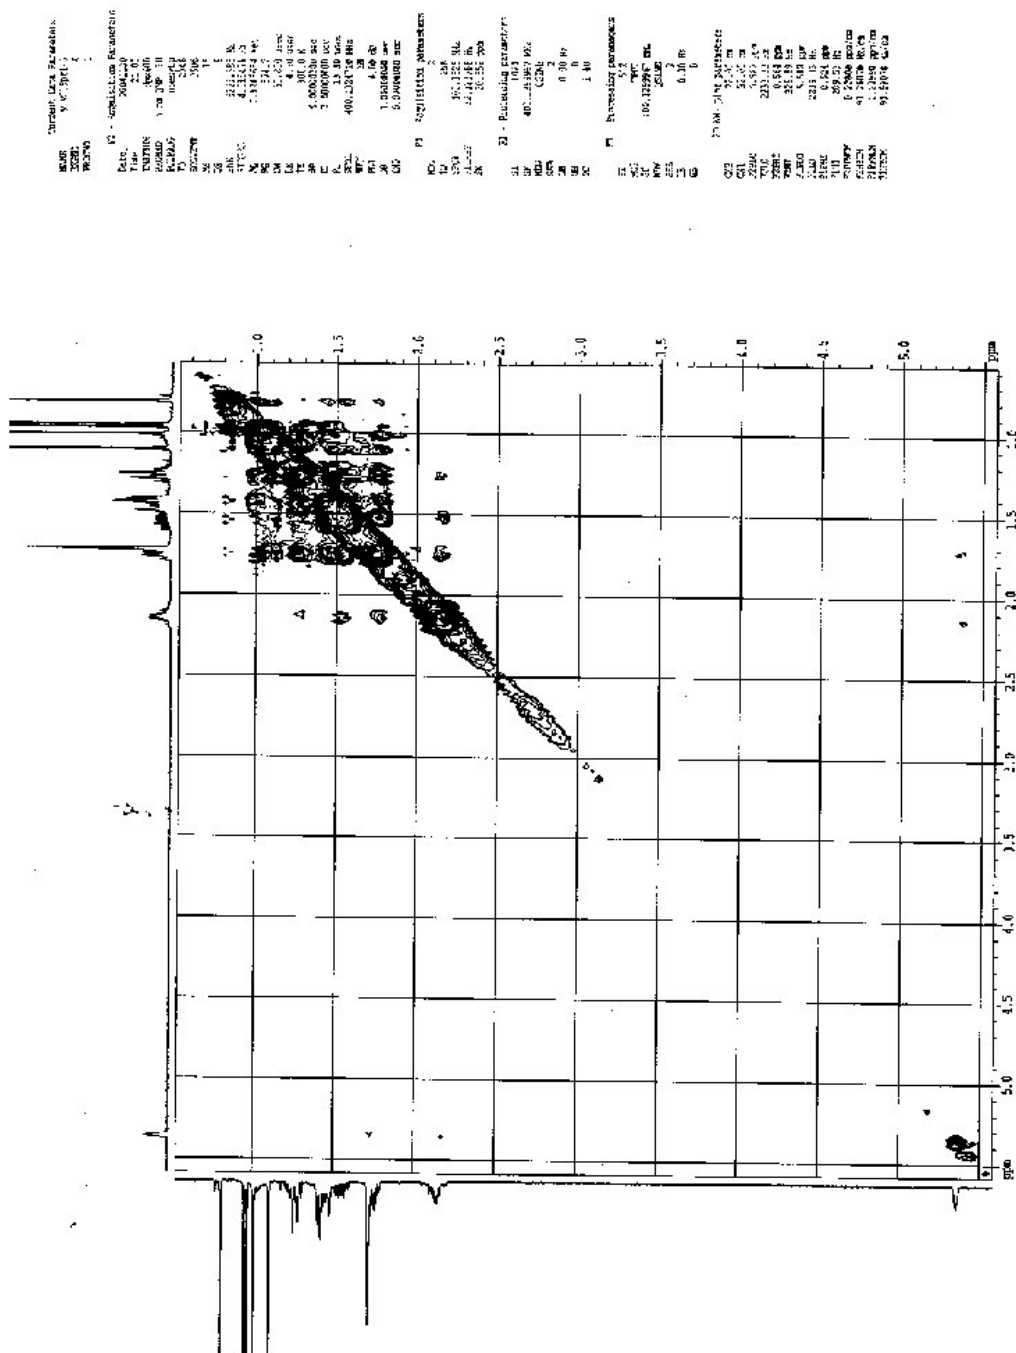

(8) HMQC spectrum of **20** in C<sub>6</sub>D<sub>6</sub>

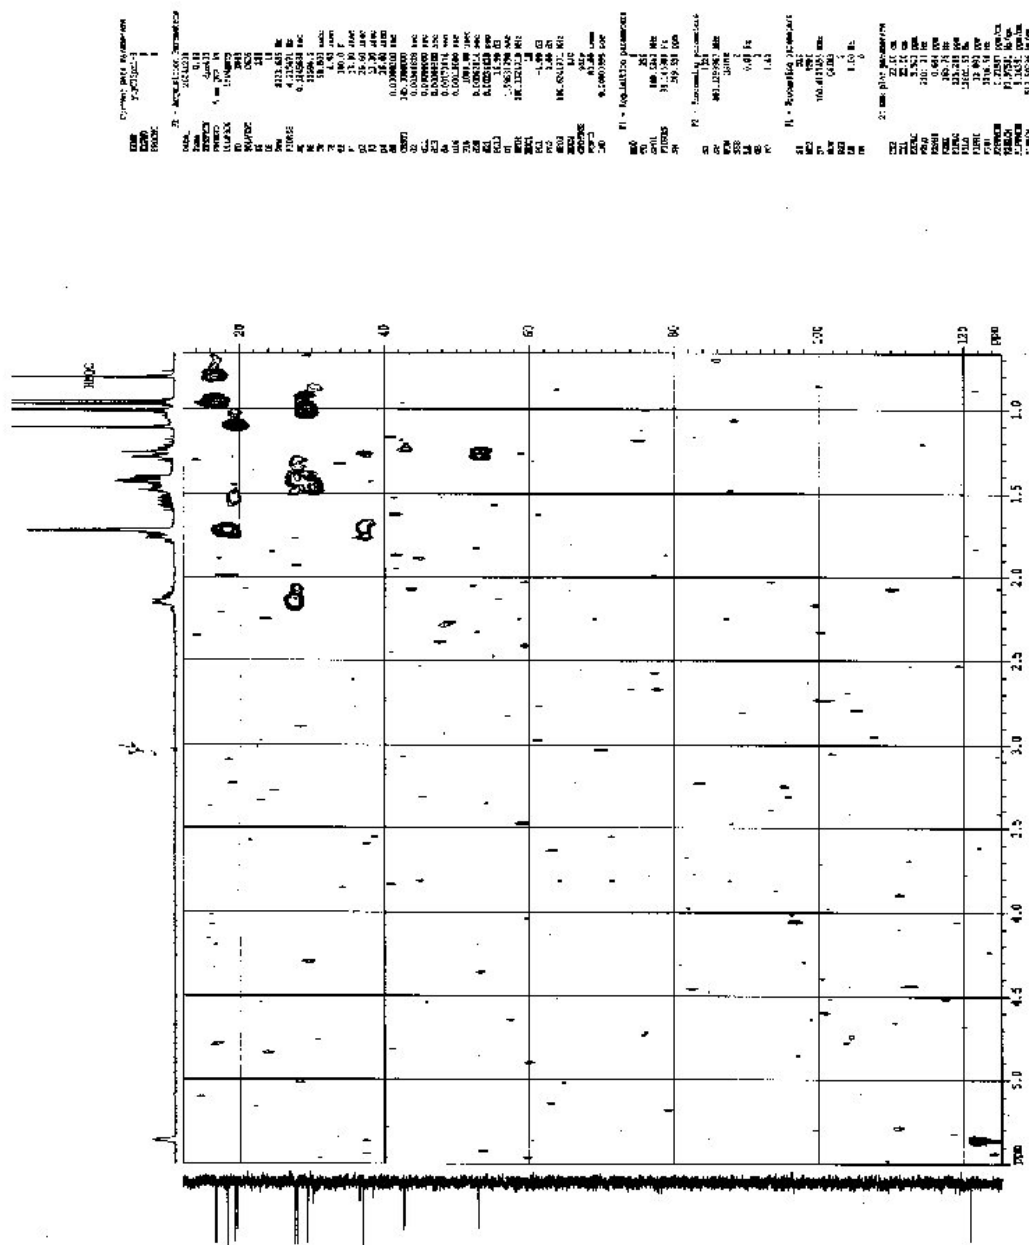



(10) HMBC spectrum (expanded region) of **20** in C<sub>6</sub>D<sub>6</sub>

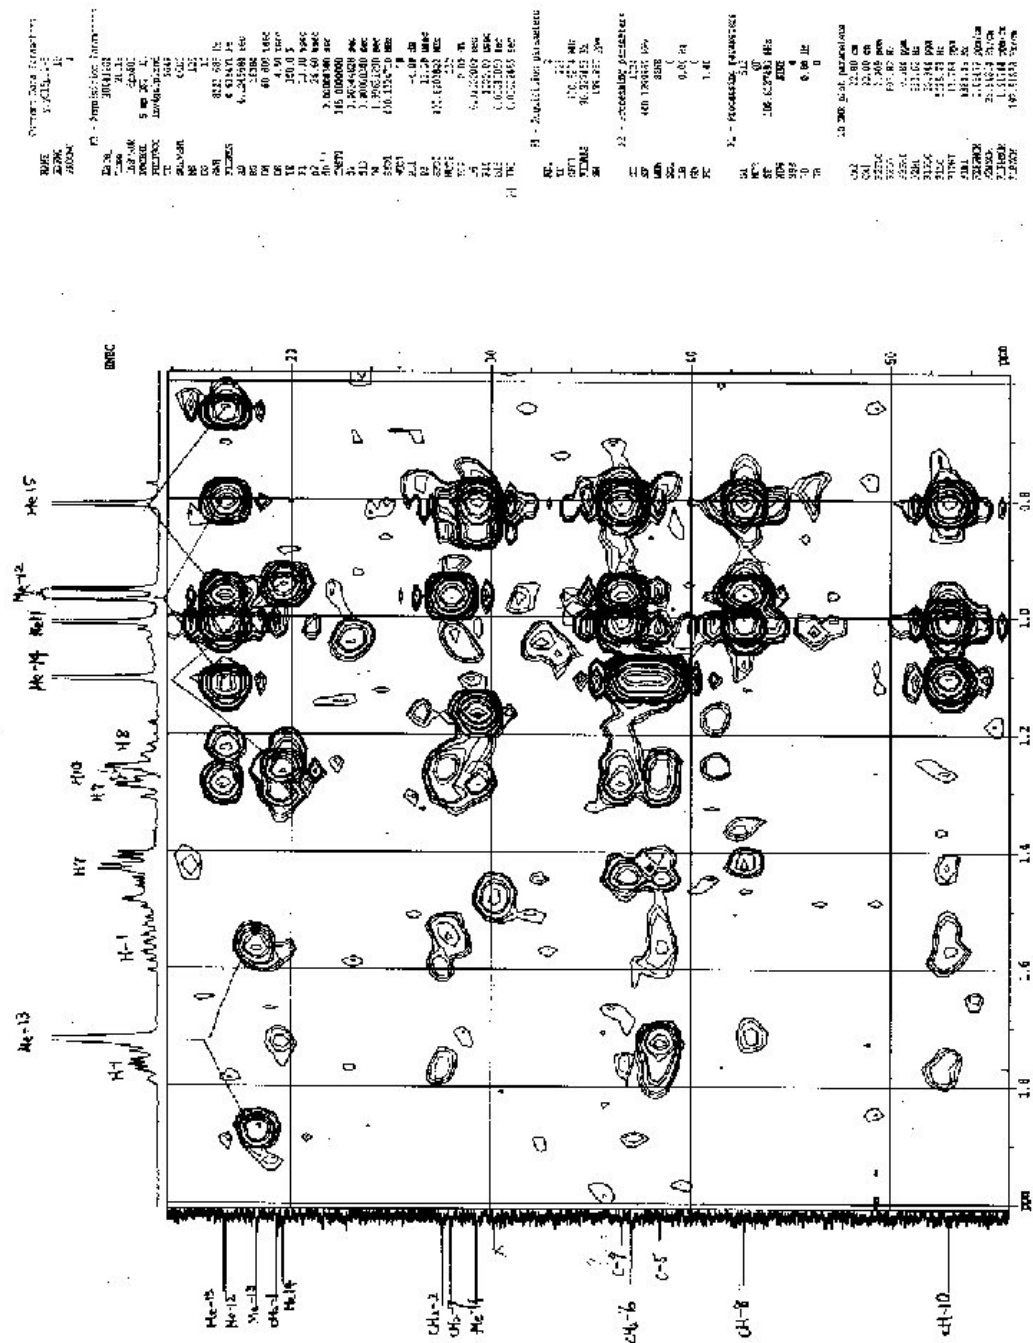

## 9. Spectroscopic data of product 21

### (1) EIMS spectrum of product 21

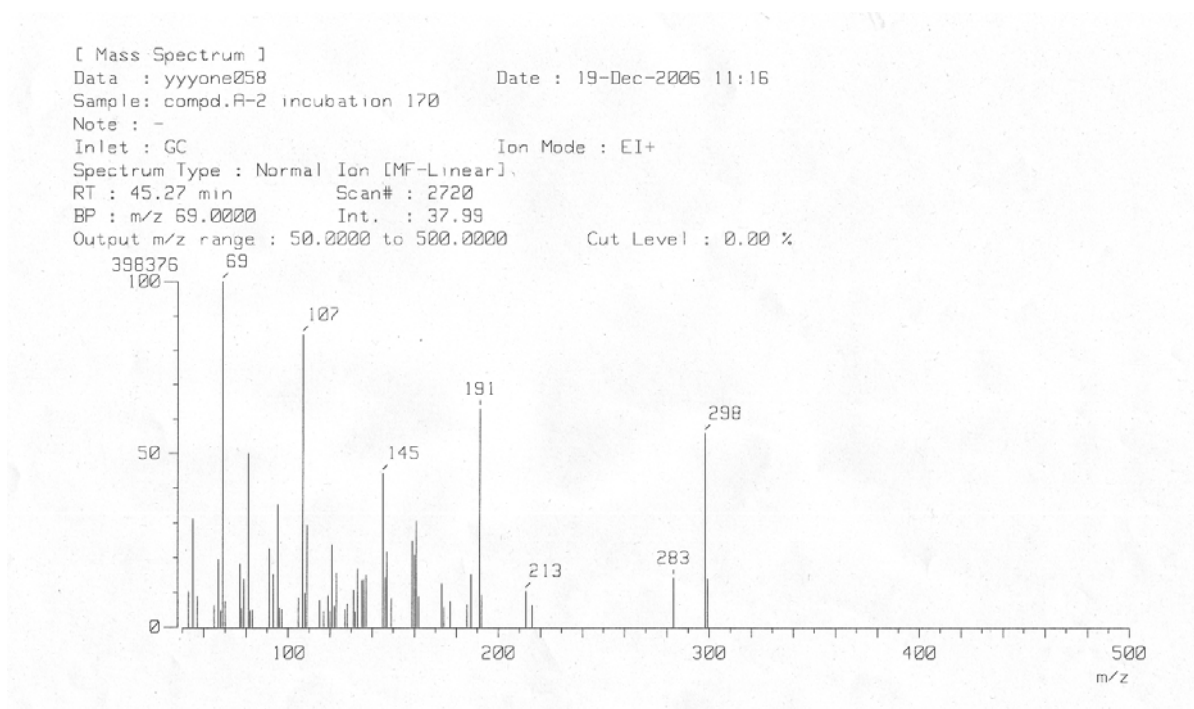

### (2) NMR data analyses and other spectral data of 21

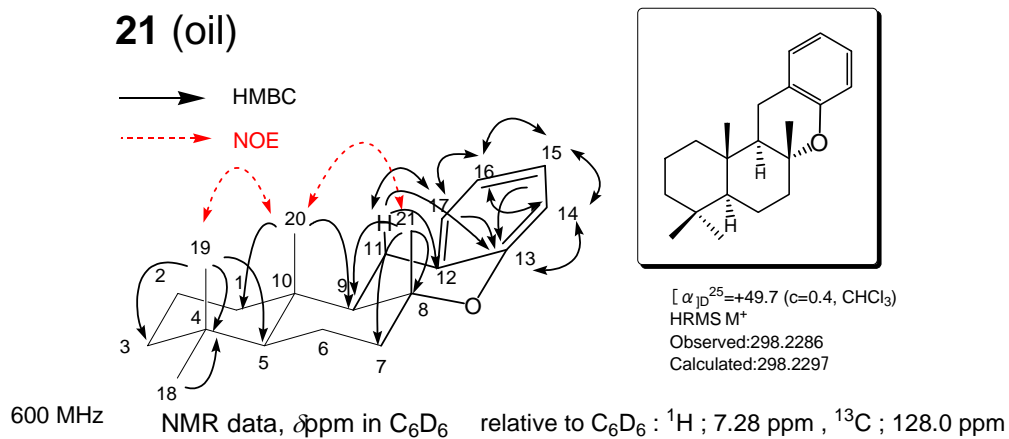

| NO. | <sup>1</sup> H                                                     | <sup>13</sup> C | NO. | <sup>1</sup> H   | <sup>13</sup> C | NO. | <sup>1</sup> H    | <sup>13</sup> C |
|-----|--------------------------------------------------------------------|-----------------|-----|------------------|-----------------|-----|-------------------|-----------------|
| 1   | 1.52(bd,12.2Hz);0.74(m)                                            | <b>39.07</b>    | 8   | —                | <b>76.77</b>    | 15  | 7.18(m)           | <b>117.5</b>    |
| 2   | 1.63(m);1.44(m)                                                    | <b>19.87</b>    | 9   | 1.59(m)          | <b>52.12</b>    | 16  | 7.18(m)           | <b>127.6</b>    |
| 3   | 1.41(m);1.14(m)                                                    | <b>41.99</b>    | 10  | —                | <b>36.77</b>    | 17  | 7.16(bd, J=7.6Hz) | <b>130.1</b>    |
| 4   | —                                                                  | <b>33.15</b>    | 11  | 2.54(2H,d,9.0Hz) | <b>22.55</b>    | 18  | 0.914(3H,s)       | <b>33.45</b>    |
| 5   | 0.89(m)                                                            | <b>55.97</b>    | 12  | —                | <b>122.4</b>    | 19  | 0.863(3H,s)       | <b>21.66</b>    |
| 6   | 1.60(m);1.23(m)                                                    | <b>18.73</b>    | 13  | —                | <b>154.0</b>    | 20  | 0.757(3H,s)       | <b>14.89</b>    |
| 7   | 1.86(ddd, J=13.0, 13.0, 4.0 Hz);<br>2.16(ddd, J=12.5, 3.2, 3.2 Hz) | <b>41.48</b>    | 14  | 6.99(m)          | <b>119.9</b>    | 21  | 1.216(3H,s)       | <b>20.95</b>    |

(3)  $^1\text{H-NMR}$  spectrum of product **21**

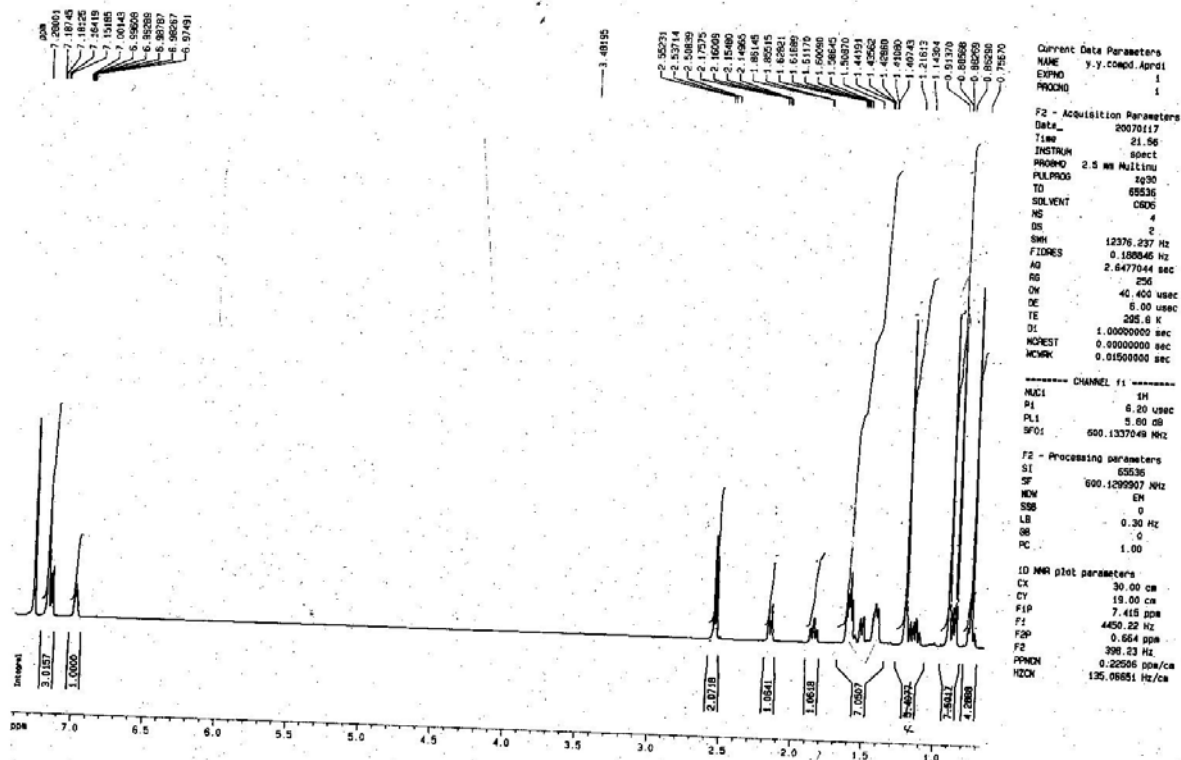

(4)  $^{13}\text{C-NMR}$  spectrum of product **21**

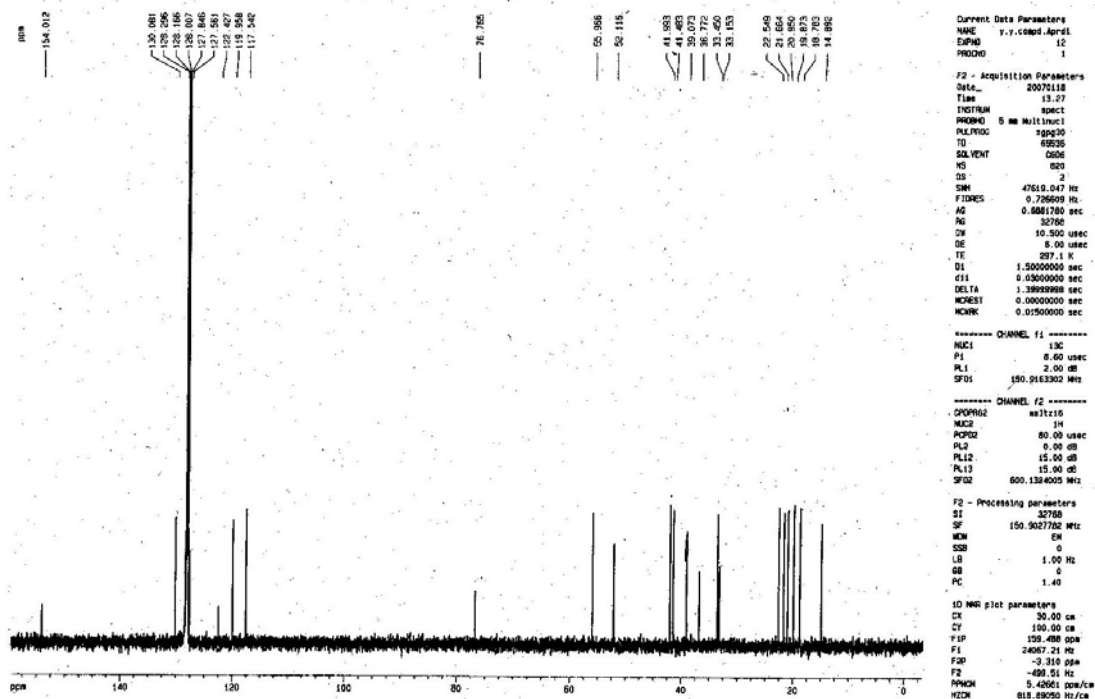

## 10. Spectroscopic data of product 22

### (1) EIMS spectrum of Product 22

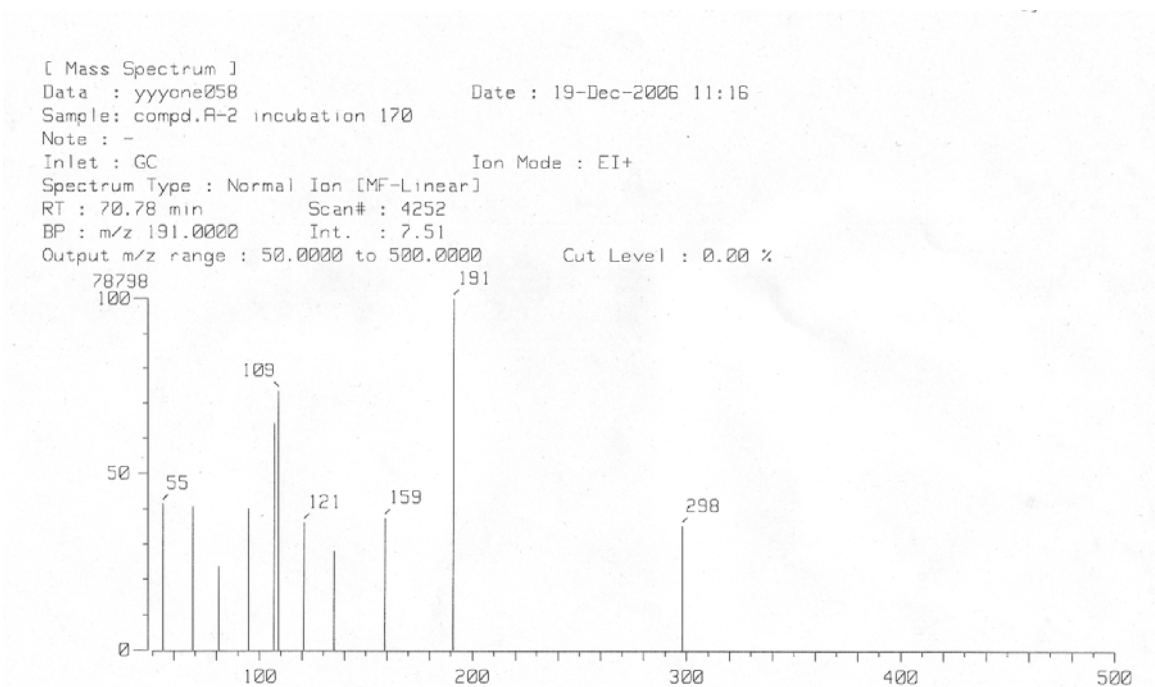

### (2) NMR data analyses and other data of product 22

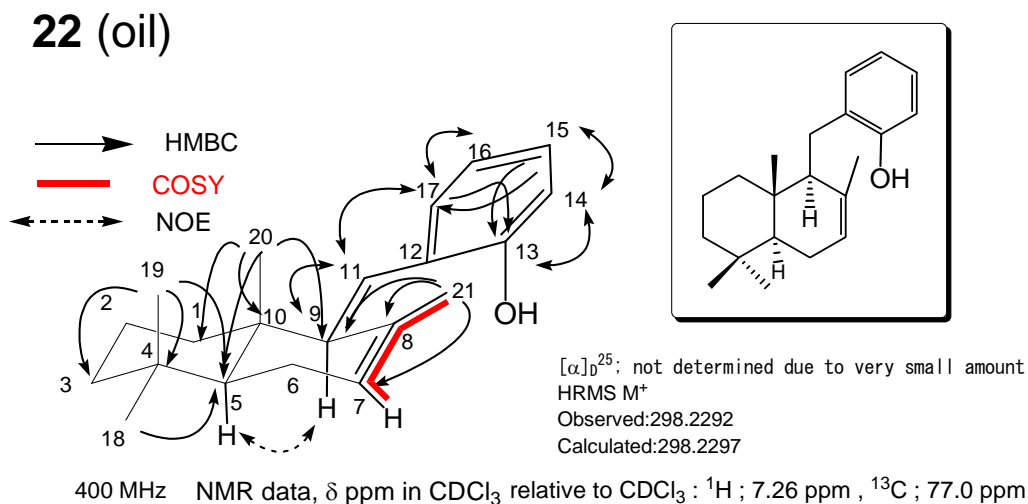

| NO. | $^1H$                                          | $^{13}C$     | NO. | $^1H$                      | $^{13}C$     | NO. | $^1H$            | $^{13}C$     |
|-----|------------------------------------------------|--------------|-----|----------------------------|--------------|-----|------------------|--------------|
| 1   | 1.94(bd,11.6Hz);<br>1.17(ddd, 3.6,13.2,13.2Hz) | <b>39.72</b> | 8   | —                          | <b>135.8</b> | 15  | 7.08 (t, 7.6 Hz) | <b>127.7</b> |
| 2   | 1.60 (m); 1.30 (m)                             | <b>19.30</b> | 9   | 2.56(bd, $J=8.0$ Hz)       | <b>54.51</b> | 16  | 6.98(t,7.6Hz)    | <b>120.7</b> |
| 3   | 1.53(m);1.31(m)                                | <b>42.58</b> | 10  | —                          | <b>37.17</b> | 17  | 7.32 (d, 7.6 Hz) | <b>130.2</b> |
| 4   | —                                              | <b>33.16</b> | 11  | 2.93(m);<br>2.76(d,15.2Hz) | <b>26.49</b> | 18  | 1.01(3H,s)       | <b>33.47</b> |
| 5   | 1.41(m)                                        | <b>50.45</b> | 12  | —                          | <b>130.3</b> | 19  | 0.998(3H,s)      | <b>22.13</b> |
| 6   | 2.08(2H, m)                                    | <b>24.97</b> | 13  | —                          | <b>153.8</b> | 20  | 1.04(3H,s)       | <b>14.09</b> |
| 7   | 5.57(bs)                                       | <b>122.4</b> | 14  | 6.39 (m)                   | <b>115.3</b> | 21  | 1.77(3H,s)       | <b>22.69</b> |



(3)  $^1\text{H}$ -NMR spectrum of product **22**

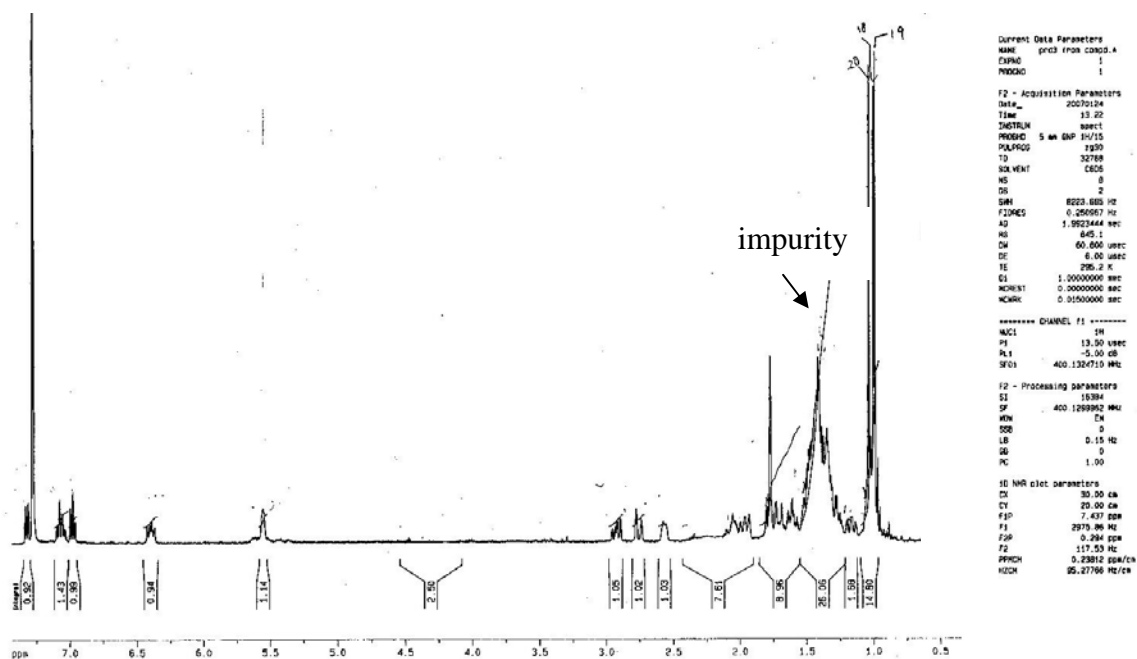

(4)  $^{13}\text{C}$ -NMR spectrum of product **22**

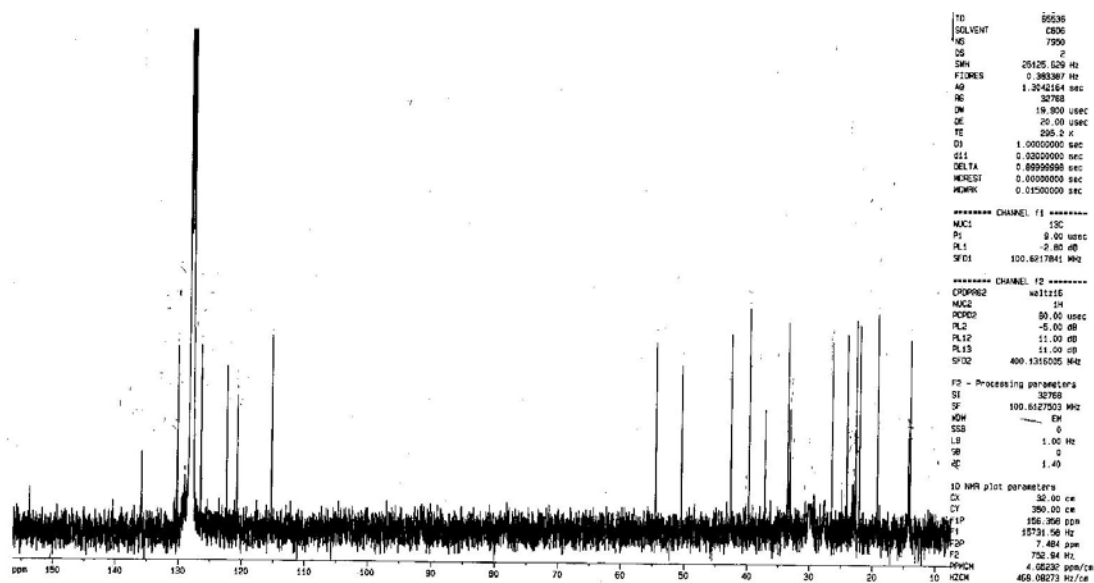

## 11. Spectroscopic data of product 23

### (1) EIMS spectrum of Product 23

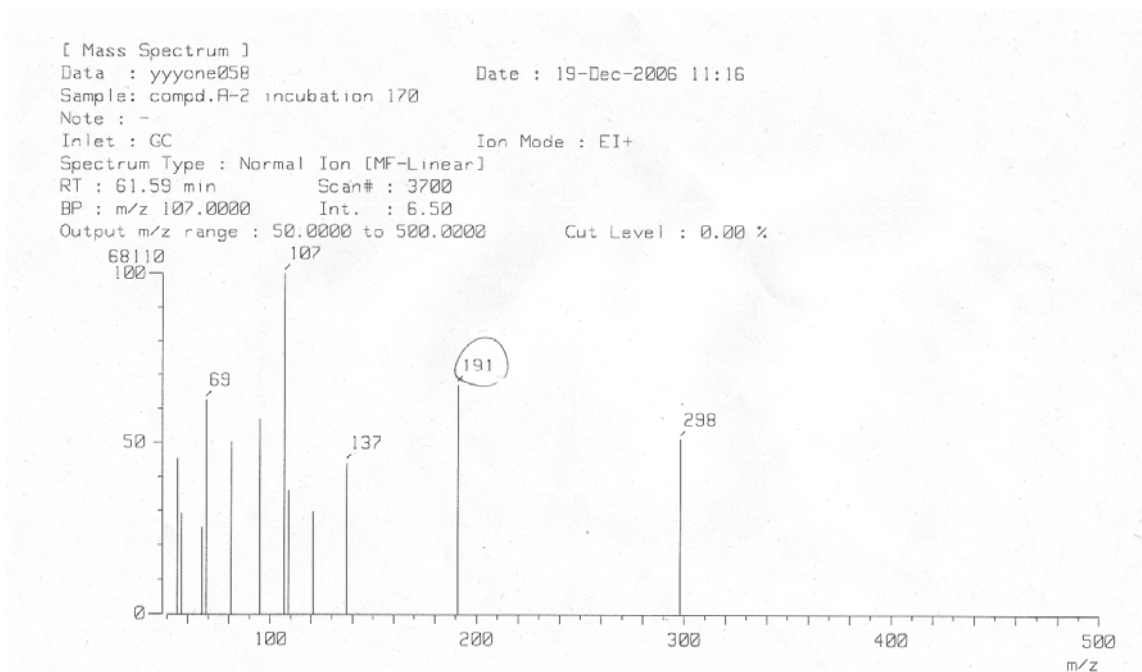

### (2) NMR data analyses and other data of product 23

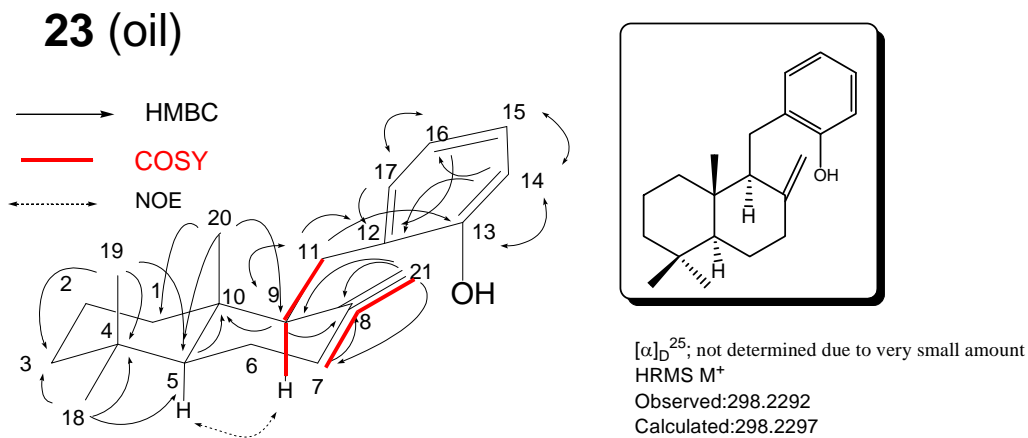

600 MHz NMR data,  $\delta$ ppm in  $CDCl_3$  relative to  $CDCl_3$ :  $^1H$ ; 7.26 ppm,  $^{13}C$ ; 77.0 ppm

| NO. | $^1H$                                      | $^{13}C$                  | NO. | $^1H$              | $^{13}C$     | NO. | $^1H$                 | $^{13}C$                  |
|-----|--------------------------------------------|---------------------------|-----|--------------------|--------------|-----|-----------------------|---------------------------|
| 1   | 1.91(d,12.0Hz);1.17(m)                     | <b>39.20</b>              | 8   | —                  | <b>149.0</b> | 15  | <b>7.03(t,7.51Hz)</b> | <b>126.6</b>              |
| 2   | 1.63(m);1.52(m)                            | <b>19.47</b>              | 9   | 2.22(br m)         | <b>56.08</b> | 16  | 6.83(t,7.5Hz)         | <b>120.5</b>              |
| 3   | 1.41(d,12.0Hz);1.19(m)                     | <b>42.21</b> <sup>a</sup> | 10  | —                  | <b>40.29</b> | 17  | 7.10 (d,7.5Hz)        | <b>129.9</b>              |
| 4   | —                                          | <b>33.67</b>              | 11  | 2.75(2H, d,8.8 Hz) | <b>23.71</b> | 18  | 0.885(3H,s)           | <b>33.64</b> <sup>a</sup> |
| 5   | 1.20(m)                                    | <b>55.74</b>              | 12  | —                  | <b>128.3</b> | 19  | 0.834(3H,s)           | <b>21.76</b>              |
| 6   | 1.76(m);1.37(m)                            | <b>24.48</b>              | 13  | —                  | <b>153.6</b> | 20  | 0.820(3H,s)           | <b>14.51</b>              |
| 7   | 2.38(d,12.7Hz);<br>2.03(ddd,4.2,12.7,12.7) | <b>38.29</b>              | 14  | 6.72 (d,7.5Hz)     | <b>115.2</b> | 21  | 4.82(s); 4.71(s)      | <b>107.5</b>              |

(3) <sup>1</sup>H-NMR spectrum of product 23

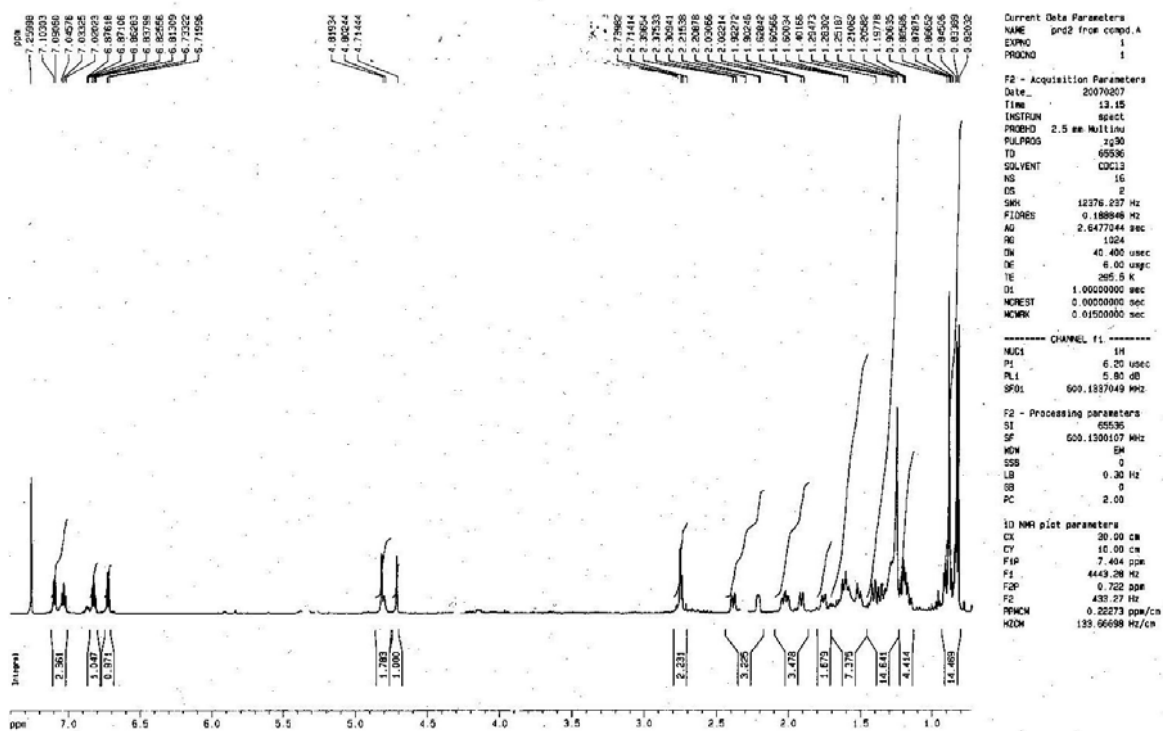

(4) <sup>13</sup>C-NMR spectrum of product 23

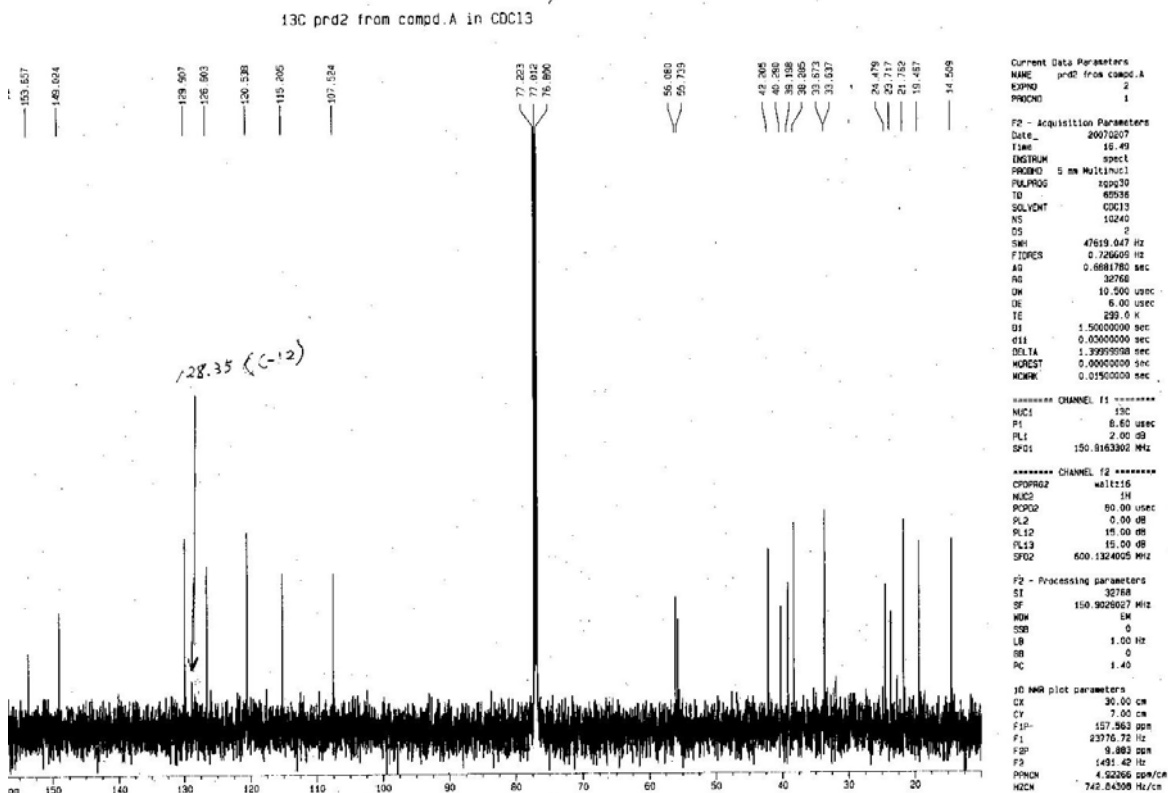

## 12. Spectroscopic data of product 24-acetate (25)

### (1) EIMS Spectrum of Product 24-Acetate (25)

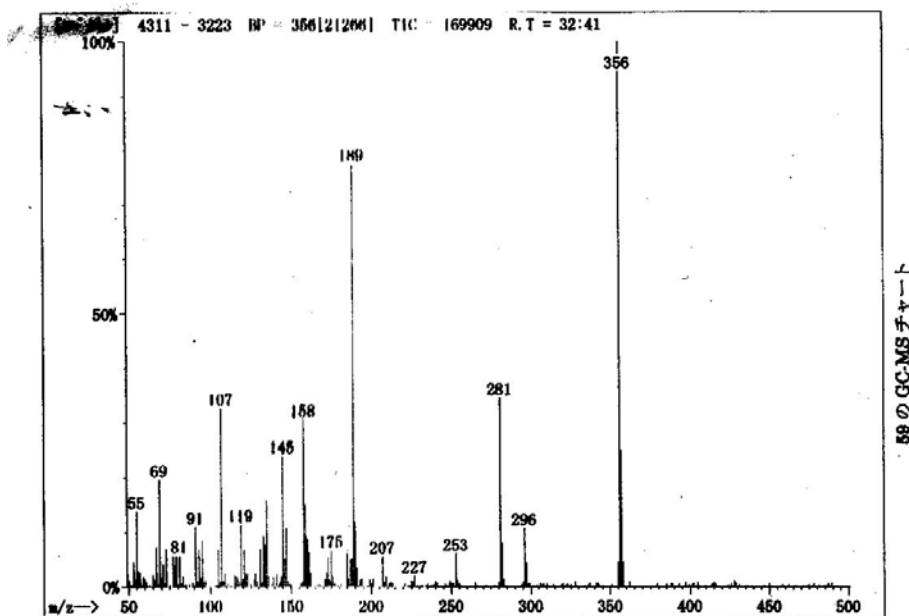

### (2) NMR data analyses and other data of product 24 acetate

#### 24-acetate

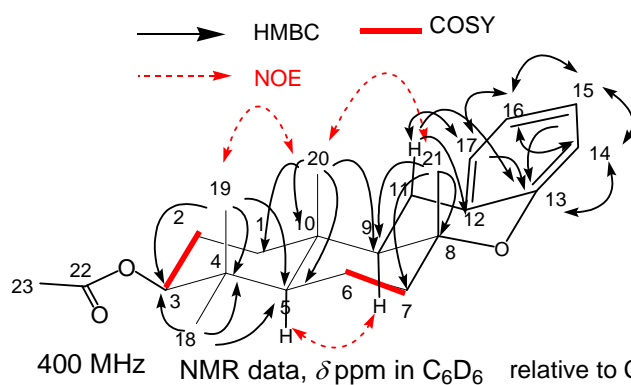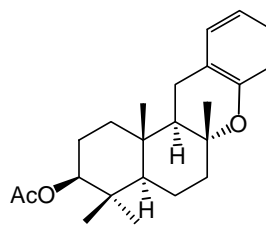

$[\alpha]_D^{25} = +25.5$  (c=0.1,  $\text{CHCl}_3$ )

HRMS  $\text{M}^+$

Observed: 356.2357

Calculated: 356.2351 FOR  $\text{C}_{23}\text{H}_{32}\text{O}_3$

400 MHz NMR data,  $\delta$  ppm in  $\text{C}_6\text{D}_6$  relative to  $\text{C}_6\text{D}_6$ :  $^1\text{H}$ ; 7.28 ppm,  $^{13}\text{C}$ ; 128.0 ppm

| NO. | $^1\text{H}$            | $^{13}\text{C}$ | NO. | $^1\text{H}$ | $^{13}\text{C}$ | NO. | $^1\text{H}$                | $^{13}\text{C}$          |
|-----|-------------------------|-----------------|-----|--------------|-----------------|-----|-----------------------------|--------------------------|
| 1   | 1.37 (m); 0.83 (m)      | <b>36.80</b>    | 8   | —            | <b>76.43</b>    | 15  | 7.18(m)                     | <b>117.5</b>             |
| 2   | 1.82(m);1.64(m)         | <b>23.84</b>    | 9   | 1.47(m)      | <b>51.59</b>    | 16  | 7.18(m)                     | <b>127.6</b>             |
| 3   | 4.70 (dd, 12.0, 4.8 Hz) | <b>80.06</b>    | 10  | —            | <b>36.30</b>    | 17  | 7.15(bd, $J=8.0\text{Hz}$ ) | <b>130.0</b>             |
| 4   | —                       | <b>37.76</b>    | 11  | 2.44 (2H, m) | <b>22.49</b>    | 18  | 0.931(3H, s)                | <b>28.02</b>             |
| 5   | 0.86(m)                 | <b>54.80</b>    | 12  | —            | <b>122.4</b>    | 19  | 0.931(3H, s)                | <b>16.78</b>             |
| 6   | 1.52 (2H, m)            | <b>19.36</b>    | 13  | —            | <b>154.0</b>    | 20  | 0.687(3H, s)                | <b>14.88</b>             |
| 7   | 2.13(m); 1.79 (m)       | <b>41.22</b>    | 14  | 6.99(m)      | <b>120.0</b>    | 21  | 1.167 (3H, s)               | <b>20.77<sup>a</sup></b> |
|     |                         |                 |     |              |                 | 22  | —                           | 169.8                    |
|     |                         |                 |     |              |                 | 23  | 1.87 (3H, s)                | <b>20.81<sup>a</sup></b> |

The carbon signals marked with a may be exchangeable.



### 13. Polycyclization reactions of 28, 31 and 32 by SHC enzyme.

28: R=H, complete cyclized product (33% yield)

31: R=indole, 6/6/5-fused tricyclic 33 and 6/6-fused-bicyclic products 34 (7.5% yield)

32: R=pyrrole, 6/6/5-fused tricyclic 35 and 6/6-fused-bicyclic products 36 (1.1% yield)

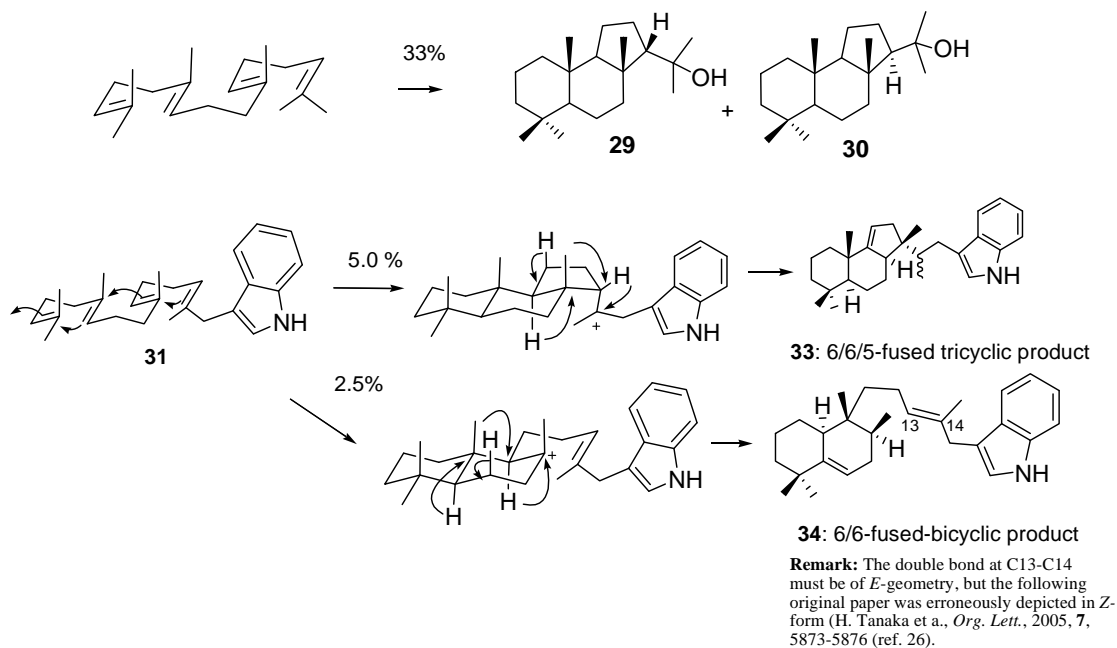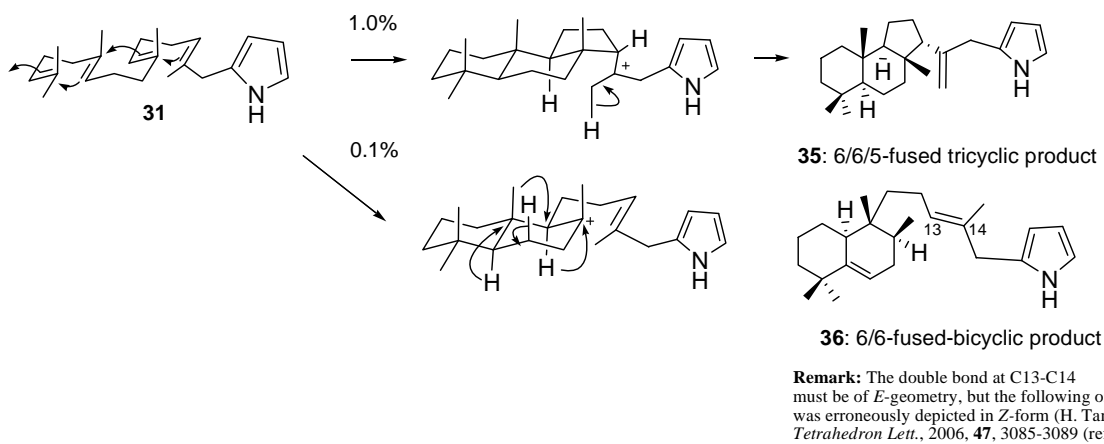

#### Full cyclization reaction

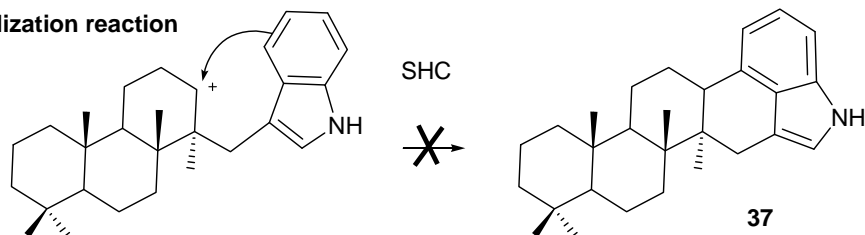

Supplement: c1ob06419c.pdf [file c1ob06419c.pdf]
